1  
2  
3  
4

## Specific immune-regulatory transcriptional signatures reveal sex and age differences in SARS-CoV-2 infected patients

5 Paula Paccielli Freire<sup>a\*</sup>, Alexandre H. C. Marques<sup>a\*</sup>, Gabriela Crispim Baiocchi<sup>a</sup>, Lena  
6 F. Schimke<sup>a</sup>, Dennyson Leandro M. Fonseca<sup>a</sup>, Ranieri Coelho Salgado<sup>a</sup>, Igor Salerno  
7 Filgueiras<sup>a</sup>, Sarah Maria da Silva Napoleao<sup>a</sup>, Desirée Rodrigues Praça<sup>b</sup>, Thiago  
8 Dominguez Crespo Hirata<sup>b</sup>, Nadia El Khawanky<sup>c</sup>, Lasse Melvaer Giil<sup>d</sup>, Gustavo  
9 Cabral de Miranda<sup>a</sup>, Robson Francisco Carvalho<sup>e</sup>, Luis Carlos de Souza Ferreira<sup>f</sup>,  
10 Antonio Condino-Neto<sup>a</sup>, Helder Takashi Imoto Nakaya<sup>b</sup>, Igor Jurisica<sup>g</sup>, Hans D.  
11 Ochs<sup>h</sup>, Niels Olsen Saraiva Camara<sup>a</sup>, Vera Lúcia Garcia Calich<sup>a</sup>, Otavio Cabral-  
12 Marques<sup>a,b,i</sup>

13

14 <sup>a</sup>Department of Immunology, Institute of Biomedical Sciences, University of São  
15 Paulo, São Paulo, SP, Brazil.

16 <sup>b</sup>Department of Clinical and Toxicological Analyses, School of Pharmaceutical  
17 Sciences, University of São Paulo, São Paulo, SP, Brazil.

18 <sup>c</sup>Department of Hematology and Oncology, Faculty of Medicine, The University of  
19 Freiburg, Freiburg, Germany

20 <sup>d</sup>Department of Internal Medicine, Haraldsplass Deaconess Hospital, Bergen,  
21 Norway.

22 <sup>e</sup>Department of Structural and Functional Biology, Institute of Biosciences, São Paulo  
23 State University (UNESP), Botucatu, SP, Brazil

24 <sup>f</sup>Laboratório de Desenvolvimento de Vacinas, Instituto de Ciências Biomédicas,  
25 Departamento de Microbiologia, Universidade de São Paulo, São Paulo, SP, Brazil.

26 <sup>g</sup>Krembil Research Institute, UHN; and Departments of Medical Biophysics and  
27 Computer Science, University of Toronto, Toronto, Canada.

28 <sup>h</sup>Department of Pediatrics, University of Washington School of Medicine, and Seattle  
29 Children's Research Institute, Seattle, WA.

30 <sup>i</sup>Network of Immunity in Infection, Malignancy, and Autoimmunity (NIIMA), Universal  
31 Scientific Education and Research Network (USERN), Sao Paulo, Brazil

32

33 \*These authors contributed equally

34

### Correspondence to:

36 Otavio Cabral-Marques, MSc, PhD  
37 Department of Immunology  
38 Institute of Biomedical Sciences - University of São Paulo  
39 Lineu Prestes Avenue, 1730, São Paulo, Brazil  
40 Email: [otavio.cmarques@usp.com](mailto:otavio.cmarques@usp.com)  
41 Phone: +55-11-974642022

42

43 or

44

45 Paula Paccielli Freire, MSc, PhD  
46 Department of Immunology  
47 Institute of Biomedical Sciences - University of São Paulo  
48 Lineu Prestes Avenue, 1730, São Paulo, Brazil  
49 Email: [freirepp2@gmail.com](mailto:freirepp2@gmail.com)  
50 Phone: +55-11-30917397

51  
52

53

## ABSTRACT

54 The coronavirus disease 2019 (COVID-19) fatality rate varies in different patient  
55 groups. However, the underlying mechanisms that explain this variation are poorly  
56 understood. Here, we reanalyzed and integrated public RNAseq datasets of  
57 nasopharyngeal swabs and peripheral blood leukocytes from patients with SARS-  
58 CoV-2, comparing transcription patterns according to sex, age, and viral load. We  
59 found that female and young patients infected by SARS-CoV-2 exhibited a similar  
60 transcriptomic pattern with a larger number of total (up- and downregulated)  
61 differentially expressed genes (DEGs) compared to males and elderly patients. The  
62 transcriptional analysis showed a sex-specific profile with a higher transcriptional  
63 modulation of immune response-associated genes in female and young subjects  
64 against SARS-CoV-2. The functional clustering was characterized by a highly  
65 correlated interferome network of cytokine/chemokine- and neutrophil-associated  
66 genes that were enriched both in nasopharyngeal cells and peripheral blood of  
67 COVID-19 patients. Females exhibited reduced transcriptional levels of key pro-  
68 inflammatory/neutrophil-related genes such as CXCL8 receptors (*CXCR1/CXCR2*),  
69 *IL-1 $\beta$* , *S100A9*, *ITGAM*, and *DBNL* compared to males, which correlate with a  
70 protective gene expression profile against inflammatory damage. Our data indicate  
71 specific immune-regulatory pathways associated with sex and age of patients  
72 infected with SARS-CoV-2. These results point out therapeutic targets to reduce  
73 morbidity and mortality of COVID-19.

74

## 75 INTRODUCTION

76 More than ten months after the outbreak of the novel Coronavirus disease  
77 2019 (COVID-19) in Wuhan, China<sup>1-3</sup>, approximately 43 million confirmed cases of  
78 COVID-19 and more than 1,1 million deaths have been reported worldwide<sup>4</sup>. The  
79 clinical spectrum of COVID-19 ranges from asymptomatic to severe pulmonary  
80 disease, leading to acute respiratory distress syndrome (ARDS)<sup>5,6</sup>. Enhanced  
81 expression of the angiotensin-converting enzyme 2 (ACE2), the SARS-CoV-2 entry  
82 receptor<sup>7</sup>, and dysregulation of the immune response likely contribute to more severe  
83 disease in older patients with comorbidities. Even as there is an increased  
84 understanding of what increases the risk of severe disease, the increased  
85 male/female mortality ratio remains poorly understood, especially considering the  
86 lack of gender differences in disease incidence<sup>6,8</sup>. A recent study reported no gender  
87 differences in the levels of anti-S1-IgM and -IgG antibody titers nor the number of  
88 naïve- or memory B cells. Compared to males, peripheral blood mononuclear cells  
89 (PBMCs) from females exhibited higher levels of terminally differentiated T cells  
90 expressing activation molecules (CD38 and HLA-DR-positive) and negative  
91 regulators (PD-1 and TIM-3)<sup>9</sup>. Moreover, male patients displayed higher plasma  
92 levels of pro-inflammatory innate immune cytokine/chemokines (*CXCL8* and *IL-18*)<sup>10</sup>.  
93 These findings indicate a better capacity for immune modulation in females  
94 compared to males.

95 The immune response to SARS-CoV-2 is characterized by hyperactivated T  
96 cells (both CD4<sup>+</sup> and CD8<sup>+</sup>)<sup>6,11</sup> and macrophages<sup>12</sup>. These hyperactivated immune  
97 cells likely contribute to the massive serum levels of pro-inflammatory cytokines, also  
98 referred to as “cytokine storm”<sup>13</sup>. In parallel, tissue damage has been associated  
99 with hyperactivation of neutrophil-induced oxidative stress and high neutrophil  
100 counts<sup>14</sup>, degranulation, and release of extracellular traps (NETs). These processes

101 are associated with increased levels of acute-phase reactants (e.g., C-reactive  
102 protein), microvascular damage, arterial thrombosis, and red blood cell dysfunction  
103 <sup>14,15</sup>. Moreover, an association between the occurrence of neutrophilia and increased  
104 production of granulocytic myeloid-derived suppressor cells (MDSCs) has also been  
105 reported. However, it is not clear whether this is harmful or adaptive <sup>16–18</sup>. Whether  
106 the function of the MDSC is different between men and women or young and elderly  
107 with COVID-19 remains an open issue.

108 Several omic studies have been conducted in patients with COVID-19 to help  
109 decipher the molecular mechanisms underlying the disease. Lieberman et al. 2020,  
110 <sup>19</sup> and Mick et al., 2020 <sup>20</sup>, recently performed RNASeq experiments investigating  
111 global transcriptional profiles of nasopharyngeal swabs from 668 individuals with  
112 SARS-CoV-2 (SC2) and 157 individuals negative of SARS-CoV-2 (Neg. SC2).  
113 Although these studies have highlighted differences in immune responses that  
114 underlie disparities in male and elderly outcomes, a consensus profile reporting the  
115 cytokines and genes associated with neutrophil-mediated immunity is still missing.  
116 The specific set of immune system genes in females underlying the protective  
117 mechanisms is another question that must be better understood and discussed.  
118 Here, we characterize a previously unnoticed interconnected transcriptome network  
119 between differentially expressed genes (DEGs) associated with cytokine-mediated  
120 signaling pathway (CMSP) and neutrophil mediated immunity (NMI) genes  
121 accordingly to sex and age. We found specific transcriptome signatures in RNASeq  
122 from nasopharyngeal swabs and peripheral blood leukocytes of human samples  
123 (**Supplementary Table 1**). Finally, we sought to identify immune transcriptomic  
124 profiles according to sex and age, as well as the regulatory networks governing the  
125 immune response to SARS-CoV-2.

## 126 RESULTS

### 127 Association between cytokine/chemokine- and neutrophil-related genes in 128 nasopharyngeal swabs

129 We first performed a transcriptomic reanalysis of nasopharyngeal swabs from  
130 patients described by Lieberman et al., 2020 (GSE152075)<sup>19</sup> to characterize the  
131 expression landscape of immune system genes. We divided the samples according  
132 to sex, age (elderly > 60y and young <60 y), and viral load (413 patients infected with  
133 SARS-CoV-2 and 54 negative controls) (**Fig. 1a**). Groups of patients with high and  
134 low viral loads, and younger and older age, were gender-matched to avoid  
135 confounding effects (**Supplementary Tables S1 and S2**). Female and young  
136 patients infected by SARS-CoV-2 exhibited a higher number of total (up- and down-  
137 regulated) differentially expressed genes (DEGs) when compared to male and elderly  
138 patients (**Fig. 1b, Supplementary Table S3**). Genes significantly deregulated in  
139 each group of patients were selected to perform enrichment analysis using the Gene  
140 Ontology terms through the Enrichr tool<sup>21,22</sup>. Overall, we observed cytokine-mediated  
141 signaling pathway (CMSP) and neutrophil-mediated immunity (NMI) categories were  
142 enriched by up- and down-regulated genes, respectively, among the compiled top-10  
143 biological process categories of each group (**Supplementary Tables S4 and S5**).  
144 Also, we used CEMiTool<sup>23</sup> to gain insights into the systemic function of  
145 nasopharyngeal swab genes by performing modular co-expression enrichment and  
146 network analyses. Among the gene-modules identified, module 1 (M1) indicated a co-  
147 expression association between genes associated with neutrophil degranulation  
148 signaling by interleukins and GPCR ligand binding (chemokines and their receptors)  
149 (**Fig. 1c**). When we compared the total number of genes associated with CMSP and  
150 NMI categories, female and young patients present higher numbers of up- and down-

151 regulated DEGs associated with these categories compared to male and elderly  
152 patients (**Fig. 1d and Supplementary Tables S6 and S7**). Females displayed an  
153 enhanced quantity of DEGs compared to male, elderly, and patients with low viral  
154 load (described in **Supplementary Tables S6-S8**). These observations indicate a  
155 higher transcriptional modulation of the immune response in female and young  
156 patients compared to male and elderly patients.

157         Next, we evaluated the strength of the association between CMSP and NMI  
158 (described in **Supplementary Tables S6-S8**). Canonical-correlation analysis (CCA)  
159 revealed a strongly correlated network between these CMSP and NMI genes in the  
160 immune response to SARS-CoV-2 (**Fig. 1e, f**). Among others, the CCA showed an  
161 association between *IL-1 $\beta$* , *IL-18* receptor accessory protein (*IL-18RAP*), C-C  
162 chemokine receptor type 1 (*CCR1*), interferon-induced guanylate-binding protein 2  
163 (*GBP2*), interferon regulatory factor (*IRF7*) with NMI transcripts such as C-X-C motif  
164 chemokine ligand 8 (*CXCL8*, also called *IL-8*), lysosome-associated membrane  
165 protein 1 (*LAMP1*) and cytochrome B-245 Alpha Chain (*CYBA*). The association of  
166 these genes suggests an orchestrated modulation between interferon regulated  
167 genes (*GBP2*, *IRF7*, and *IFI30*), recruitment and neutrophil degranulation (*CXCL8*  
168 and *LAMP1*), and oxidative stress (*CYBA*). Taken together, the CCA analysis  
169 suggests that these two sets (CMSP and NMI) of highly correlated genes have a  
170 systemic representativity, suggesting pathophysiological relevance in COVID-19  
171 patients.

## 172 **CMSP and NMI modular gene co-expression and enrichment in whole blood** 173 **leukocytes from COVID-19 patients**

174         Modular co-expression enrichment analyses of whole blood leukocytes from  
175 COVID-19 patients from a recent, publicly available dataset (GSE157103)<sup>24</sup> showed

176 coherent results compared to the swab dataset analyses. CEMITool analysis  
177 revealed ten co-expression modules enriched in whole leukocytes of COVID-19  
178 patients compared to the control group. Among them, module M6 was enriched by  
179 interferon signaling genes, while module M7 was composed of genes associated with  
180 neutrophil degranulation in the COVID-19 group (**Fig. 2a-c**). The data, therefore,  
181 points toward a systemic (not restricted to upper airways) immunopathological  
182 association between interferon signaling and neutrophil-mediated immunity in  
183 patients with COVID-19. **Supplementary Tables S9** and **S10** describe the DEGs  
184 associated with CMSP and NMI in the GSE157103 dataset.

### 185 **Effect of sex and age on cytokine-mediated signaling pathways in COVID-19** 186 **patients**

187 To better understand the effect of gender and age on the anti-SARS-CoV-2  
188 immune response in patients with COVID-19, we sought to further characterize the  
189 influence of gender and age on CMSP (detailed pro- or anti-inflammatory function of  
190 each gene is described in **Supplementary Table 11**). Multivariate comparison  
191 analysis of genes associated with CMSP identified in the nasopharyngeal swabs  
192 (GSE152075) revealed an upregulated spectrum of gene expression between SARS-  
193 CoV-2 positive (SC2) and negative (Neg. SC2) groups (**Fig. 3a**). Central tendency  
194 (median, **Fig. 3b**) and variability (interquartile range, **Extended Data Fig. 1**) analysis  
195 of CMSP transcriptional levels demonstrate the overall tendency in each SARS-CoV-  
196 2 positive and negative subgroups (female, male, young, elderly, high and low viral  
197 load). Hierarchical clustering analyses of gene expression revealed similarities  
198 between the CMSP signature of female and young groups and a close relationship  
199 between male and elderly patients. Female and young patients clustered with  
200 patients who had high viral loads, the latter presenting the patients with the most



201 upregulated CMSP (**Fig. 3c and 3d**). Conversely, males and elderly patients  
202 clustered near patients with low viral load. In this context, anti-viral transcripts  
203 induced by interferons<sup>25</sup> were most upregulated in female, young and high-viral-load  
204 patients compared to male, elderly and low-viral-load patients. These included  
205 Interferon Induced Protein With Tetratricopeptide Repeats (*IFIT1*, *IFIT2*, *IFIT3*;  
206 chemokine (C-X-C motif) ligand (*CXCL9*, *CXCL10*, *CXCL11*; 2', 5'-oligoadenylate  
207 synthetase (*OAS1*, *OAS2*, and *OAS3*; tripartite motif (*TRIM5* and *TRIM22*). The  
208 same phenomenon was observed in terms of transcripts of endogenous activators of  
209 the immune system, such as the *CD40* ligand and co-stimulatory molecules (*CD80*  
210 and *CD86*). Thus, our data suggest a higher transcriptional modulation of the immune  
211 response triggered by SARS-CoV-2 in female and young patients compared to males  
212 and elderly.

### 213 **Sex and age differences in neutrophil-mediated immunity**

214 Patients with SARS-CoV-2 infections have been reported to have a higher  
215 number of MDSCs<sup>16–18</sup>. In agreement with Schulte-Schrepping et al.<sup>26</sup>, our  
216 differential expression analysis revealed several downregulated genes related to NMI  
217 are associated with MDSCs. These include *CYBA*, *CXCL8*, *CSTB*, *JUN*, *FOS*, and  
218 *MIF*<sup>26</sup> (**Fig. 4a and 4b**), which are involved in neutrophil degranulation and  
219 activation oxidative stress, and antimicrobial peptides in SARS-CoV-2 positive  
220 individuals. The detailed function of each gene is described in **Supplementary Table**  
221 **12**. Among them are cathepsins (*CTSB*, *CTSD*, and *CTSH*), migration inhibitory  
222 factor (*MIF*), heat shock proteins (heat shock 70 kDa protein 1A or *HSPA1A*; and  
223 *HSPA1B*), and cytochrome B-245 Alpha Chain (*CYBA*). Hierarchical clustering  
224 analysis of NMI genes demonstrated that low viral load, female, and young patients  
225 presented a more downregulated transcriptomic profile (**Fig. 4c**). This was seen to a

226 lesser extent in male and elderly patients. The cluster analysis suggests that these  
227 expression patterns reflect a close functional relationship (**Fig. 4d**) between low load,  
228 female and young patients.

229 We next analyzed the CMSP and NMI genes in two different datasets  
230 (GSE157103 and GSE156063). The circos plot showed that patients with a high viral  
231 load shared a higher number of CMSP genes with younger and female patients (**Fig.**  
232 **4e**). Interestingly, female, young, and low-load patients shared more common NMI  
233 genes in swab and total leukocytes than male and elderly patients (**Fig. 4f**). This  
234 result suggests a predominant downregulation of NMI genes in groups of patients  
235 who do not develop severe disease. **Extended Data Fig. 2** shows the result of ridge  
236 regression analysis, which indicates associations of each gene belonging to the  
237 CMSP and NMI (described below) with viral load, in line with the formerly described  
238 results. Of note, several genes present in the dataset GSE152075 were also  
239 identified in another study of nasopharyngeal swabs developed by Mick et al.  
240 (**Extended Data Fig. 3**, dataset GSE156063), increasing the validity of these  
241 findings. Further, the upregulation of CMSP and NMI genes was present in both the  
242 datasets described above, which are of bulk RNAseq, and in a single-cell RNAseq  
243 study (**Extended Data Fig. 4**).

#### 244 **Specific immune response-associated gene modulations in female infected** 245 **with SARS-CoV-2**

246 Considering the increased male/female mortality ratio (**Extended Data Fig. 5**),  
247 we sought to further characterize the transcriptomic features of COVID-19. We  
248 searched for sex differences between DEGs identified in female vs. male patients  
249 with COVID-19 as well as female vs. healthy male controls throughout the different  
250 RNAseq datasets. For instance, females with SARS-CoV2 showed reduced levels of

251 *CXCL8* and its receptors (*CXCR1* and *CXCR2*) in different swab datasets (**Fig 5a-**  
252 **5d**). In addition, Mick's and Liberman's datasets presented a considerable overlap of  
253 DEGs and shared functional enrichment categories. We found that downregulated  
254 genes in females SC2 also enriched CMSP and NMI pathways (**Extended Data Fig.**  
255 **6**). These shared genes are essential for conventional neutrophil chemotaxis and the  
256 recruitment of polymorphonuclear neutrophil (PMN)-MDSCs <sup>26</sup>. Females also  
257 exhibited reduced levels of *IL-1β* when compared to male patients, a pro-  
258 inflammatory cytokine considered a potential target for COVID-19 therapy<sup>27</sup>. Other  
259 pro-inflammatory transcripts (neurobeachin like 2, *NBEAL2*) critical for leukocyte  
260 recruitment and granule exocytosis <sup>28,29</sup> or alarmins that are released during tissue  
261 damage (S100 Calcium Binding Protein A9, *S100A9*) <sup>30,31</sup> were lower in swabs from  
262 females infected with SARS-CoV-2 in comparison to males. Multivariate regression  
263 analysis indicated that the expression of genes shown in **Fig. 5a** and **5b** was strongly  
264 associated with the remaining genes belonging to CMSP and NMI (**Fig. 5g** and  
265 **Extended Data Figs. 7 and 8**). In addition, this approach indicates that females tend  
266 to systemically have a subtle lower gene expression pattern of immune genes  
267 compared to males infected with SARS-CoV-2. Likewise, **Extended Data Fig 7a** and  
268 **7b** show the multivariate regressions between these DEGs' expression from females  
269 with the viral load and age, respectively. These results suggest that not all these  
270 genes demonstrate a divergent correlation by different viral loads and age, indicating  
271 that this modulation may be associated exclusively with male-female differences.

272 Sex differences between DEGs of healthy controls showed downregulation of  
273 several genes belonging to CMSP compared to negative for SARS-CoV-2 males (**Fig**  
274 **5e**). Among them are promoters of the H<sub>2</sub>O<sub>2</sub> production in airways (NADPH oxidase  
275 enzymes Dual Oxidase 2, *DUOX2*)<sup>32</sup>, regulators of cell adhesion (Fibronectin  
276 Leucine-Rich Transmembrane protein 2, *FLRT2*), and proliferation (Laminin B-2). In

277 contrast, NMI genes were upregulated in Neg. SC2 females compared to Neg. SC2  
278 males (**Fig 5f**). These results show that even in the absence of the SARS-CoV-2,  
279 females present a different expression pattern of these genes, indicating that the  
280 immune response may be sex-dependent. This mucosal baseline state of reduced  
281 CMSP and increased NMI resembles an immune protective quiescent-like<sup>33–35</sup> state.  
282 **Fig. 6a** summarizes these DEGs from females described above and their molecular  
283 function. Beyond the genes mentioned above, COVID-19 females presented seven  
284 exclusive DEGs (**Fig. 6b**) compared to the other SARS-CoV-2 positive groups  
285 (**Supplementary Table 8**). The Integrin Subunit Alpha M (*ITGAM*) participates in  
286 both IL-4/IL13 signaling and neutrophil degranulation, and three upregulated DEGs  
287 (*OPRD1*, *JAK3*, and *ITGAM*) is associated with IL-4/IL-13 signaling. *LRRK2* was not  
288 associated with any of these pathways. This signaling antagonizes the IFN-mediated  
289 immune response in the airways<sup>36</sup>. The other three downregulated DEGs (*JUP*,  
290 *DYNLL1*, and *DBNL*) belong to the neutrophil degranulation category. This  
291 differential expression reinforces the possibility of a better-modulated transcriptome  
292 profile of females in response to SARS-CoV-2.

293 In addition, to better understand this immune modulation profile underlying the  
294 relationship of CMSP and NMI gender dimorphism in COVID-19, we performed an  
295 Interferome analysis of these two sets of DEGs. This analysis revealed an  
296 interconnected network of IFN-regulated genes modulated either by IFN type I, II,  
297 and III (**Fig. 6b and Supplementary Tables 13 and 14**).

## 298 **DISCUSSION**

299 Here, we provide a systemic and integrative transcriptomic investigation  
300 aiming to identify signature changes that might explain the higher  
301 male/female mortality ratio observed in patients with COVID-19. We consistently

302 found several upregulated CMSP and NMI DEGs throughout different public datasets  
303 of large patient cohorts infected with SARS-CoV-2. CCA and interferome analysis  
304 indicated that these DEGs form an interconnected network of several IFN-regulated  
305 genes. Females and young patients exhibited a higher capacity to trigger a higher  
306 transcriptional modulation than male and elderly patients. At the same time, females  
307 and young patients displayed downregulation of inflammatory genes such as *CXCL8*  
308 receptors (*CXCR1* and *CXCR2*), *IL-1 $\beta$* , *NBEAL2*, and *S100A9*. These genes are  
309 considered key players in immunological pathways involved in multiorgan injury and  
310 consequent death reported in COVID-19 <sup>16,17,26,37–39</sup>. Our data is consistent with a  
311 recent report by Takahashi et al. showing lower plasma levels of *CXCL8* in females  
312 than male patients <sup>10</sup>. Therefore, females may have protective transcriptional  
313 plasticity against harmful inflammation and the consequent tissue damage caused by  
314 the SARS-CoV-2 infection.

315 The role of neutrophils in the pathophysiology of COVID-19 is currently  
316 debated. While these cells are classically known to play an essential role in the  
317 immune response against bacterial and fungal infections, their antiviral function has  
318 only recently been characterized<sup>40–42</sup>. Neutrophils infiltrate the respiratory tract during  
319 viral infection and are required for a protective immune response against coronavirus.  
320 They also contribute significantly to respiratory tract pathology, i.e., hemorrhagic  
321 lesions, epithelial barrier permeability, and cellular inflammation in the lungs <sup>43</sup>.  
322 Neutrophilia has consistently been found in COVID-19 patients and correlates with  
323 worse clinical outcomes<sup>14,44–46</sup>. However, recent studies assessing the activation  
324 status of neutrophils in COVID-19 patients have come to somewhat paradoxical  
325 results. Some investigators have identified that severe SARS-CoV-2 infection is  
326 associated with excessive release of reactive oxygen species (ROS) and neutrophil  
327 extracellular traps (NETs)<sup>14,15</sup>. Conversely, other studies demonstrated that the

328 expansion of MDSCs increased with the severity of COVID-19, which agrees with our  
329 report of downregulated NMI signature <sup>16,18,47</sup>.

330 MDSCs are a heterogeneous group of immature myeloid cells that have the  
331 capacity to suppress non-specific T and B lymphocyte responses <sup>18,48</sup>. Much of our  
332 knowledge about MDSCs have been obtained through cancer studies <sup>47</sup>, showing  
333 that tumors manipulate the myeloid system to evade the host immune response<sup>49</sup>.  
334 However, the physiological role of MDSCs has become increasingly evident in  
335 COVID-19. The results of several studies suggest that MDSCs are components of  
336 the healthy immune system and play a protective role in homeostatic and disease  
337 contexts. MDSCs expand when necessary to protect the host against tissue damage  
338 during autoimmune and inflammatory diseases<sup>50,51</sup>, traumatic stress, transplantation,  
339 and sepsis <sup>48,49,52</sup>. While MDSCs may potentially represent biomarkers of COVID-19  
340 severity, their presence suggests an attempt of the host to modulate the severe  
341 immune dysregulation triggered by SARS-CoV-2. In the same way, the high capacity  
342 of women to better modulate CMSP and NMI could represent a protective  
343 mechanism against severe COVID-19.

344 Notably, although playing a central role in the anti-viral immunity, hyper  
345 induction of IFNs following systemic activation of IFN-related genes have life-  
346 threatening immunopathological effects in COVID-19 <sup>37</sup>. The interferome network,  
347 when well-orchestrated, is protective not only by promoting an anti-viral milieu but  
348 also by limiting airway inflammation by directly modulating pathogenic neutrophil  
349 accumulation<sup>53</sup>. Therefore, to address the threshold that shifts the IFN milieu from a  
350 protective to detrimental state, it will be imperative to identify markers that allow for  
351 appropriate therapeutic administration of IFN or JAK inhibitors to selected patients  
352 with COVID-19 <sup>54,55</sup>.

353           While our study offers an explanation for the differences between mortality and  
354 morbidity between males and females with COVID-19, further potential mechanisms  
355 should be addressed. For instance, estrogen receptor signaling may protect against  
356 another coronavirus (SARS-CoV) <sup>56</sup>. Furthermore, the sex-driven dimorphic immune  
357 response could be due to the location of several immune genes or immune regulatory  
358 genes on the X chromosome <sup>56</sup>. Moreover, future studies need to evaluate the  
359 possible impact of sex-related risk factors for mortality in COVID-19 (smoking,  
360 alcohol consumption, and comorbidities) <sup>57-59</sup> on the immune response against  
361 SARS-CoV-2.

362           In conclusion, our integrative approach indicates that the gene expression  
363 profile associated with CMSP and NMI has a distinct pattern according to sex and  
364 age in patients with COVID-19. Thus, suggesting the existence of specific immune-  
365 regulatory pathways underlying the sexual dimorphism of COVID-19 morbidity and  
366 mortality. The specific profile of immune genes may help the future development of  
367 better targeted therapies to improve the outcomes of COVID-19.

368

369

370

## 371 **Online Methods**

### 372 **Data Collection and Differential Expression Analysis**

373 Lieberman et al., 2020<sup>19</sup>, and Mick et al., 2020<sup>20</sup>, recently performed RNASeq  
374 experiments investigating global transcriptional profiles of nasopharyngeal swabs  
375 from 668 individuals with SARS-CoV-2 (SC2) and 157 individuals negative of SARS-  
376 CoV-2 (Neg. SC2) (data accessible at NCBI GEO database<sup>60</sup>, accession number  
377 GSE GSE152075<sup>19</sup> and GSE156063<sup>20</sup>). We retrieved the datasets to characterize the  
378 immunological signature. Read counts were transformed (log2 count per million or  
379 CPM), and differentially expressed transcripts between groups were identified  
380 through the webtool NetworkAnalyst 3.0 (<https://www.networkanalyst.ca/>)<sup>61</sup> using  
381 limma-voom pipeline<sup>62</sup>. Age (< 60 young and ≥ 60 elderly individuals), gender (male  
382 and female), and viral load (only for GSE152075) categorized as previously  
383 described<sup>19</sup>. The cycle threshold (Ct) of the SARS-CoV-2 nucleocapsid gene region 1  
384 (N1) target during diagnostic PCR: low viral load (N1 Ct > 24) and high viral load (N1  
385 Ct < 19), defined the viral load. We applied the statistical cut-offs of log2 fold-change  
386 > 1 and adjusted p-value < 0.05 to determine DEGs between the categories. For  
387 subsequent analysis, we followed the limma-voom pipeline to identify DEGs between  
388 female and male.

### 389 **Enrichment Analysis and Data Visualization**

390 We used these DEGs to identify different ontology terms. Biological processes [Gene  
391 Ontology (GO)] were analyzed using EnrichR (available at  
392 <http://amp.pharm.mssm.edu/Enrichr/>)<sup>21,63</sup>, and the enriched immunological terms  
393 were generated according to adjusted p-value < 0.05 and Z-score (correction to the  
394 test) in a combined score provided by EnrichR database<sup>21,63</sup>. The Biological Process  
395 terms were included in an integrative analysis using the criterion of over-



396 representation (Log2 combined score > 2) in at least two categories. Concomitantly,  
397 we performed the analysis of gene co-expression modules with the R-package  
398 CEMiTool using default parameters<sup>23</sup>. We plotted the set of genes associated with  
399 CMSP (GO:0019221) and NMI (GO:0002446) in bubble-based heat maps with  
400 hierarchical clustering using web tool Morpheus  
401 (<https://software.broadinstitute.org/morpheus/>)<sup>64</sup> with Euclidian distance metric.  
402 GraphPad Prisma v.8 (GraphPad Software) was used to generate the violin plots.  
403 The UniProtKB database (available at <http://www.uniprot.org/>) was used to access  
404 the functional information. We used clusterProfiler<sup>65</sup> to obtain dot plots and Cnetplots  
405 of enriched terms associated with CMSP and NMI-associated genes. Shared CMSP  
406 and NMI genes among all groups were displayed using Circos Plot (<http://circos.ca/>).  
407 The identification of interferome genes was performed with Interferome V2.01  
408 (<http://www.interferome.org/interferome/home.jsp>).

#### 409 **Molecular Network of CMSP and NMI Genes**

410 Network of cytokine-mediated signaling pathway and neutrophil-mediated immunity  
411 was constricted using DEGs, and highlighting the genes differentially expressed in  
412 female samples. DEGs were used as input into Integrated Interactions Database (IID  
413 version 2020-05; <http://ophid.utoronto.ca/iid>),<sup>66,67</sup> to identify direct physical protein  
414 interactions. The resulting network was annotated, analyzed, and visualized using  
415 NAViGaTOR 3.013 (PMID: 19837718). Final network was exported in SVG format  
416 and finalized with legends in Adobe Illustrator. Node color represents GO molecular  
417 function as per legend. Triangles pointing up indicate CMSP genes, triangles pointing  
418 down indicate NMI genes. The light blue circles represent DEGs in females in both  
419 infected and uninfected samples. Blue edges highlight NMI interactions; red edges  
420 reflect CMSP interactions. The lower left subnetwork and lower right subnetwork

421 show the interactions between CMSP and NMI genes, respectively. Protein name  
422 color represents the type of interferome associated with the gene.

423

## 424 **Statistics**

425 Prior to the application of the statistical methods described below, the variable  
426 transformation was performed as described in each figure legend. For gene  
427 expression data, we added unity to all counts and consecutively applied a base two  
428 logarithmic function for each gene variable, herein called transformed gene  
429 expression. The remaining quantitative variables were scaled. Only CMSP and NMI  
430 genes were included in the data analysis as response variables. We used  
431 Nonparametric Multivariate Analysis of Variance (NP-MANOVA)<sup>68</sup> to test differences  
432 on the mean vectors of gene expressions between SARS-CoV-2 positive (SC2) and  
433 negative (Neg. SC2) groups, separately for both CMSP and NMI genes.

### 434 *Relative effect analysis*

435 For each gene, relative effects<sup>68</sup> of transformed expression were compared between  
436 SC2 and Neg. SC2 groups, with associated 95% confidence intervals, calculated via  
437 bootstrap simulation using the method of resampling pairs<sup>69</sup>. Bootstrap statistics were  
438 based on 1000 simulations and percentile confidence intervals<sup>69</sup>.

### 439 *Canonical Correlation Analysis*

440 Canonical Correlation Analysis (CCA)<sup>70</sup> was applied in order to investigate patterns  
441 of association between genes related to CMSP and NMI genes, considering the  
442 observations from the SC2 group alone. We retained the first two canonical variates  
443 (CVs) for subsequent interpretations.

### 444 *Ridge Regression*

445 We used Ridge Regression<sup>71</sup> for setting up a predictive model for the response  
446 variable viral load as a function of the regression covariates age, gender, and  
447 transformed gene expressions, considering observations from the SC2 group alone.  
448 Model estimates were obtained using 10-fold cross validation<sup>71</sup>. As a testing set, 25%  
449 of the dataset was kept and used for evaluating the model prediction accuracy.

#### 450 *Multivariate Regression*

451 We performed Multivariate Regression (MVR) analysis with normally distributed  
452 additive errors<sup>72</sup> to model the mean vector of transformed gene expression  
453 associated with the six genes found with differentially expression in females (CD14,  
454 CXCR1, CXCR2, IL1B, NBEAL2, and S100A9), considering the observations from  
455 the SC2 group alone. The regression covariates included were the principal  
456 component scores of the remaining genes and variables age and viral load. These  
457 scores resulted from a Principal Component Analysis (PCA) based on the  
458 transformed gene expressions for genes not included as responses in the MVR  
459 mode. After PCA, the estimated matrix of loadings was rotated using the varimax  
460 criterion. The Likelihood Ratio (LR) and Wald statistics were used, respectively, for  
461 testing the generalized hypothesis involving MRV model parameters and obtaining  
462 the statistical significance of each regression slope individually<sup>72</sup>. The level of  
463 significance for all hypothesis testing was fixed at 5%, and the wild bootstrap method  
464 was used for calculating p-values and parameter's standard errors robust against  
465 heteroscedasticity on the regression errors<sup>73</sup>. Bootstrap statistics were based on  
466 1000 simulations<sup>69</sup>. Model adequacy was studied using the metrics developed in  
467 Díaz-García et al., 2003<sup>72</sup>.

#### 468 **Statistical Software and packages**

469 The sample median and sample interquartile range were calculated using R software  
470 version 4.0.2 (<https://www.r-project.org/index.html>). The NP-MANOVA, CCA, MVR,  
471 and Ridge Regression analysis were all performed on the R software version 4.0.2.  
472 Specifically, for NP-MANOVA, it was used the `npmv` package<sup>68</sup> for CCA the  
473 `whitening`<sup>70</sup>, `DFA`, and `CANCOR` packages, for Ridge Regression the `glmnet`  
474 package and for PCA the `psych` package. MVR was implemented by the authors  
475 following the results of García et al. (2003)<sup>72</sup>. Finally, all statistical graphs were  
476 constructed using the functionalities of the `ggplot2` package<sup>74</sup>.

#### 477 **Ethical Statement**

478 Since we used publicly available data Ethical approval was not applicable.

#### 479 **Acknowledgments**

480 We acknowledge the São Paulo Research Foundation (FAPESP grants 2017/05264-  
481 7 to NOSC, 2018/18886-9 to OCM, 2020/01688-0 to OCM, 2020/07069-0 to OCM,  
482 2020/07972-1 to OTC, and 2020/09146-1 to PPF) for financial support.  
483 Computational analysis was supported in part by the grants from Ontario Research  
484 Fund (#34876), Natural Sciences Research Council (NSERC #203475), Canada  
485 Foundation for Innovation (CFI #29272, #225404, #33536) and IBM. This study was  
486 financed in part by the Coordenação de Aperfeiçoamento de Pessoal de Nível  
487 Superior - Brasil (CAPES) - Finance Code 001.

488

#### 489 **Author Contributions**

490 PPF, AM, OCM co-wrote the manuscript and provided scientific insights; PPF, AM,  
491 TDCH, IJ, and OCM, performed bioinformatics analyses; PPF, GCB, RFC, LCSF,  
492 ACN, HN, NOSC, VC, and OCM conceived and designed the study; PPF, AM, GCB,  
493 ISF, LFS, RCS, SN, DRP, GCM, OCM, analyzed data; PPF, AM, GLM, LFS, NEK,

494 GLM, GCM, RFC, LCS, ACN, HN, IJ, HDO, NOSC, VC, and OCM revised and edited  
495 the final manuscript; VC and OCM supervised the project.

496

497 **Competing interest statement**

498 The authors declare no competing financial and/or non-financial interests in relation  
499 to the work described.

500 **Data availability**

501 The published bulk RNAseq datasets can be found in the GEO database  
502 (GSE152075, GSE157103, GSE156063). Single-cell RNAseq data (**dataset**  
503 **EGA00001004571**) was obtained from neutrophil clusters, as reported by Schulte-  
504 Schrepping et al<sup>75</sup>.

505 **REFERENCES**

- 506 1. Li, R. *et al.* Substantial undocumented infection facilitates the rapid  
507 dissemination of novel coronavirus (SARS-CoV-2). *Science* (80-. ). **368**, 489–  
508 493 (2020).
- 509 2. Lescure, F. X. *et al.* Clinical and virological data of the first cases of COVID-19  
510 in Europe: a case series. *Lancet Infect. Dis.* **20**, 697–706 (2020).
- 511 3. Progress report on the coronavirus pandemic. *Nature* **584**, 325 (2020).
- 512 4. WHO Coronavirus Disease (COVID-19) Dashboard | WHO Coronavirus  
513 Disease (COVID-19) Dashboard.
- 514 5. Sun, P., Qie, S., Liu, Z., Ren, J. & Xi, J. Clinical Characteristics of 5732  
515 Patients with 2019-nCoV Infection. *SSRN Electron. J.* (2020)  
516 doi:10.2139/ssrn.3539664.
- 517 6. Song, J. W. *et al.* Immunological and inflammatory profiles in mild and severe  
518 cases of COVID-19. *Nat. Commun.* **11**, 1–10 (2020).
- 519 7. Hoffmann, M. *et al.* SARS-CoV-2 Cell Entry Depends on ACE2 and TMPRSS2  
520 and Is Blocked by a Clinically Proven Protease Inhibitor. *Cell* **181**, 271-280.e8  
521 (2020).
- 522 8. Bhopal, S. S. & Bhopal, R. Sex differential in COVID-19 mortality varies  
523 markedly by age. *The Lancet* vol. 396 532–533 (2020).
- 524 9. Sakuishi, K. *et al.* Targeting Tim-3 and PD-1 pathways to reverse T cell  
525 exhaustion and restore anti-tumor immunity. *J. Exp. Med.* (2010)  
526 doi:10.1084/jem.20100643.
- 527 10. Takahashi, T. *et al.* Sex differences in immune responses that underlie COVID-  
528 19 disease outcomes. *Nature* 1–6 (2020) doi:10.1038/s41586-020-2700-3.
- 529 11. Chen, Z. & John Wherry, E. T cell responses in patients with COVID-19. *Nature*  
530 *Reviews Immunology* vol. 20 529–536 (2020).
- 531 12. Merad, M. & Martin, J. C. Pathological inflammation in patients with COVID-19:  
532 a key role for monocytes and macrophages. *Nature Reviews Immunology* vol.  
533 20 355–362 (2020).
- 534 13. Moore, J. B. & June, C. H. Cytokine release syndrome in severe COVID-19.  
535 *Science* vol. 368 473–474 (2020).
- 536 14. Laforge, M. *et al.* Tissue damage from neutrophil-induced oxidative stress in  
537 COVID-19. *Nature Reviews Immunology* vol. 20 515–516 (2020).
- 538 15. Zuo, Y. *et al.* Neutrophil extracellular traps in COVID-19. *JCI Insight* **5**, (2020).
- 539 16. Schulte-Schrepping, J. *et al.* Severe COVID-19 Is Marked by a Dysregulated  
540 Myeloid Cell Compartment. *Cell* (2020) doi:10.1016/j.cell.2020.08.001.
- 541 17. Silvin, A. *et al.* Elevated Calprotectin and Abnormal Myeloid Cell Subsets  
542 Discriminate Severe from Mild COVID-19. *Cell* **182**, 1401 (2020).
- 543 18. Agrati, C. *et al.* Expansion of myeloid-derived suppressor cells in patients with  
544 severe coronavirus disease (COVID-19). *Cell Death Differ.* 1–12 (2020)  
545 doi:10.1038/s41418-020-0572-6.
- 546 19. Lieberman, N. A. P. *et al.* In vivo antiviral host transcriptional response to  
547 SARS-CoV-2 by viral load, sex, and age. *PLOS Biol.* **18**, e3000849 (2020).
- 548 20. Mick, E. *et al.* Upper airway gene expression differentiates COVID-19 from  
549 other acute respiratory illnesses and reveals suppression of innate immune  
550 responses by SARS-CoV-2. *medRxiv Prepr. Serv. Heal. Sci.* (2020)  
551 doi:10.1101/2020.05.18.20105171.
- 552 21. Kuleshov, M. V *et al.* Enrichr: a comprehensive gene set enrichment analysis  
553 web server 2016 update. *Nucleic Acids Res.* **44**, W90-7 (2016).
- 554 22. Chen, E. Y. *et al.* Enrichr: interactive and collaborative HTML5 gene list  
555 enrichment analysis tool. *BMC Bioinformatics* **14**, 128 (2013).

- 556 23. Russo, P. S. T. *et al.* CEMiTool: a Bioconductor package for performing  
557 comprehensive modular co-expression analyses. *BMC Bioinformatics* **19**, 56  
558 (2018).
- 559 24. Overmyer, K. A. *et al.* Large-Scale Multi-omic Analysis of COVID-19 Severity.  
560 *Cell Syst.* (2020) doi:10.1016/j.cels.2020.10.003.
- 561 25. Rusinova, I. *et al.* Interferome v2.0: an updated database of annotated  
562 interferon-regulated genes. *Nucleic Acids Res.* **41**, D1040-6 (2013).
- 563 26. Sun, L. *et al.* Inhibiting myeloid-derived suppressor cell trafficking enhances T  
564 cell immunotherapy. *JCI Insight* **4**, (2019).
- 565 27. Huet, T. *et al.* Anakinra for severe forms of COVID-19: a cohort study. *Lancet*  
566 *Rheumatol.* (2020) doi:10.1016/S2665-9913(20)30164-8.
- 567 28. Sowerby, J. M. *et al.* NBEAL2 is required for neutrophil and NK cell function  
568 and pathogen defense. *J. Clin. Invest.* **127**, 3521–3526 (2017).
- 569 29. Tariket, S., Guerrero, J. A., Garraud, O., Ghevaert, C. & Cognasse, F. Platelet  
570  $\alpha$ -granules modulate the inflammatory response under systemic  
571 lipopolysaccharide injection in mice. *Transfusion* **59**, 32–38 (2019).
- 572 30. Crowe, L. A. N. *et al.* S100A8 & S100A9: Alarmin mediated inflammation in  
573 tendinopathy. *Sci. Rep.* **9**, 1–12 (2019).
- 574 31. Wang, S. *et al.* S100A8/A9 in inflammation. *Frontiers in Immunology* vol. 9  
575 1298 (2018).
- 576 32. Fink, K. *et al.* IFN $\beta$ /TNF $\alpha$  synergism induces a non-canonical STAT2/IRF9-  
577 dependent pathway triggering a novel DUOX2 NADPH Oxidase-mediated  
578 airway antiviral response. *Cell Res.* **23**, 673–690 (2013).
- 579 33. Card, C. M., Ball, T. B. & Fowke, K. R. Immune Quiescence: A model of  
580 protection against HIV infection. *Retrovirology* vol. 10 141 (2013).
- 581 34. Yao, X. D. *et al.* Acting locally: Innate mucosal immunity in resistance to HIV-1  
582 infection in Kenyan commercial sex workers. *Mucosal Immunol.* **7**, 268–279  
583 (2014).
- 584 35. McLaren, P. J. *et al.* HIV-exposed seronegative commercial sex workers show  
585 a quiescent phenotype in the CD4+ T cell compartment and reduced  
586 expression of HIV-dependent host factors. in *Journal of Infectious Diseases*  
587 vol. 202 (J Infect Dis, 2010).
- 588 36. Zissler, U. M. *et al.* Interleukin-4 and interferon- $\gamma$  orchestrate an epithelial  
589 polarization in the airways. *Mucosal Immunol.* **9**, 917–926 (2016).
- 590 37. Broggi, A. *et al.* Type III interferons disrupt the lung epithelial barrier upon viral  
591 recognition. *Science* **369**, 706–712 (2020).
- 592 38. Jose, R. J. & Manuel, A. COVID-19 cytokine storm: the interplay between  
593 inflammation and coagulation. *The Lancet Respiratory Medicine* vol. 8 e46–e47  
594 (2020).
- 595 39. Condamine, T., Mastio, J. & Gabrilovich, D. I. Transcriptional regulation of  
596 myeloid-derived suppressor cells. *J. Leukoc. Biol.* **98**, 913–922 (2015).
- 597 40. Gabriel, C., Her, Z. & Ng, L. F. P. Neutrophils: Neglected players in viral  
598 diseases. *DNA and Cell Biology* vol. 32 665–675 (2013).
- 599 41. Naumenko, V., Turk, M., Jenne, C. N. & Kim, S. J. Neutrophils in viral infection.  
600 *Cell and Tissue Research* vol. 371 505–516 (2018).
- 601 42. Galani, I. E. & Andreaskos, E. Neutrophils in viral infections: Current concepts  
602 and caveats. *J. Leukoc. Biol.* **98**, 557–564 (2015).
- 603 43. Haick, A. K., Rzepka, J. P., Brandon, E., Balemba, O. B. & Miura, T. A.  
604 Neutrophils are needed for an effective immune response against pulmonary  
605 rat coronavirus infection, but also contribute to pathology. *J. Gen. Virol.* **95**,  
606 578–590 (2014).

- 607 44. Zhou, Z. *et al.* Heightened Innate Immune Responses in the Respiratory Tract  
608 of COVID-19 Patients. *Cell Host Microbe* **27**, 883-890.e2 (2020).
- 609 45. Huang, C. *et al.* Clinical features of patients infected with 2019 novel  
610 coronavirus in Wuhan, China. *Lancet* **395**, 497–506 (2020).
- 611 46. Giamarellos-Bourboulis, E. J. *et al.* Complex Immune Dysregulation in COVID-  
612 19 Patients with Severe Respiratory Failure. *Cell Host Microbe* **27**, 992-  
613 1000.e3 (2020).
- 614 47. Kumar, V., Patel, S., Tcyganov, E. & Gabrilovich, D. I. The Nature of Myeloid-  
615 Derived Suppressor Cells in the Tumor Microenvironment. *Trends in*  
616 *Immunology* vol. 37 208–220 (2016).
- 617 48. Condamine, T. & Gabrilovich, D. I. Molecular mechanisms regulating myeloid-  
618 derived suppressor cell differentiation and function. *Trends in Immunology* vol.  
619 32 19–25 (2011).
- 620 49. Gabrilovich, D. I., Ostrand-Rosenberg, S. & Bronte, V. Coordinated regulation  
621 of myeloid cells by tumours. *Nature Reviews Immunology* vol. 12 253–268  
622 (2012).
- 623 50. Kollmann, T. R., Kampmann, B., Mazmanian, S. K., Marchant, A. & Levy, O.  
624 Protecting the Newborn and Young Infant from Infectious Diseases: Lessons  
625 from Immune Ontogeny. *Immunity* vol. 46 350–363 (2017).
- 626 51. Gabrilovich, D. I. & Nagaraj, S. Myeloid-derived suppressor cells as regulators  
627 of the immune system. *Nature Reviews Immunology* vol. 9 162–174 (2009).
- 628 52. Crook, K. R. Role of myeloid-derived suppressor cells in autoimmune disease.  
629 *World J. Immunol.* **4**, 26 (2014).
- 630 53. Nandi, B. & Behar, S. M. Regulation of neutrophils by interferon- $\gamma$  limits lung  
631 inflammation during tuberculosis infection. *J. Exp. Med.* **208**, 2251–2262  
632 (2011).
- 633 54. Lee, J. S. & Shin, E. C. The type I interferon response in COVID-19:  
634 implications for treatment. *Nature Reviews Immunology* 1–2 (2020)  
635 doi:10.1038/s41577-020-00429-3.
- 636 55. Acharya, D., Liu, G. Q. & Gack, M. U. Dysregulation of type I interferon  
637 responses in COVID-19. *Nature Reviews Immunology* vol. 20 397–398 (2020).
- 638 56. Scully, E. P., Haverfield, J., Ursin, R. L., Tannenbaum, C. & Klein, S. L.  
639 Considering how biological sex impacts immune responses and COVID-19  
640 outcomes. *Nat. Rev. Immunol.* **20**, 442–447 (2020).
- 641 57. Vardavas, C. I. & Nikitara, K. COVID-19 and smoking: A systematic review of  
642 the evidence. *Tobacco Induced Diseases* vol. 18 (2020).
- 643 58. Gagliardi, M. C., Tieri, P., Ortona, E. & Ruggieri, A. ACE2 expression and sex  
644 disparity in COVID-19. *Cell Death Discovery* vol. 6 1234567890 (2020).
- 645 59. Kopel, J. *et al.* Racial and Gender-Based Differences in COVID-19. *Frontiers in*  
646 *Public Health* vol. 8 418 (2020).
- 647 60. Edgar, R., Domrachev, M. & Lash, A. E. Gene Expression Omnibus: NCBI  
648 gene expression and hybridization array data repository. *Nucleic Acids Res.*  
649 **30**, 207–210 (2002).
- 650 61. Zhou, G. *et al.* NetworkAnalyst 3.0: A visual analytics platform for  
651 comprehensive gene expression profiling and meta-analysis. *Nucleic Acids*  
652 *Res.* **47**, W234–W241 (2019).
- 653 62. Law, C. W., Chen, Y., Shi, W. & Smyth, G. K. Voom: Precision weights unlock  
654 linear model analysis tools for RNA-seq read counts. *Genome Biol.* **15**, R29  
655 (2014).
- 656 63. Chen, E. Y. *et al.* Enrichr: interactive and collaborative HTML5 gene list  
657 enrichment analysis tool. *BMC Bioinformatics* **14**, 128 (2013).



- 658 64. Starruß, J., de Back, W., Bruschi, L. & Deutsch, A. Morpheus: a user-friendly  
659 modeling environment for multiscale and multicellular systems biology.  
660 *Bioinformatics* **30**, 1331–2 (2014).
- 661 65. Yu, G., Wang, L. G., Han, Y. & He, Q. Y. ClusterProfiler: An R package for  
662 comparing biological themes among gene clusters. *Omi. A J. Integr. Biol.* **16**,  
663 284–287 (2012).
- 664 66. Kotlyar, M., Pastrello, C., Malik, Z. & Jurisica, I. IID 2018 update: Context-  
665 specific physical protein-protein interactions in human, model organisms and  
666 domesticated species. *Nucleic Acids Res.* **47**, D581–D589 (2019).
- 667 67. Pastrello, C., Kotlyar, M. & Jurisica, I. Informed use of protein–protein  
668 interaction data: A focus on the integrated interactions database (IID). in  
669 *Methods in Molecular Biology* vol. 2074 125–134 (Humana Press Inc., 2020).
- 670 68. Ellis, A. R., Burchett, W. W., Harrar, S. W. & Bathke, A. C. Nonparametric  
671 inference for multivariate data: The R package nprmv. *J. Stat. Softw.* **76**, 1–18  
672 (2017).
- 673 69. Eck, D. J. Bootstrapping for multivariate linear regression models. *Stat. Probab.*  
674 *Lett.* **134**, 141–149 (2018).
- 675 70. Jendoubi, T. & Strimmer, K. A whitening approach to probabilistic canonical  
676 correlation analysis for omics data integration. *BMC Bioinformatics* **20**, 15  
677 (2019).
- 678 71. Engebretsen, S. & Bohlin, J. Statistical predictions with glmnet. *Clin.*  
679 *Epigenetics* **11**, 123 (2019).
- 680 72. Díaz-García, J. A., Rojas, M. G. & Leiva-Sánchez, V. Influence diagnostics for  
681 elliptical multivariate linear regression models. *Commun. Stat. - Theory*  
682 *Methods* **32**, 625–641 (2003).
- 683 73. Flachaire, E. Bootstrapping heteroskedasticity consistent covariance matrix  
684 estimator. *Comput. Stat.* **17**, 501–506 (2002).
- 685 74. Wickham, H. Getting Started with ggplot2. in 11–31 (2016). doi:10.1007/978-3-  
686 319-24277-4\_2.
- 687 75. Schulte-Schrepping, J. *et al.* Severe COVID-19 Is Marked by a Dysregulated  
688 Myeloid Cell Compartment. *Cell* **182**, 1419-1440.e23 (2020).
- 689  
690

## 691 Figure Legends

692 **Fig. 1 | Transcriptomic analysis of swabs from SARS-CoV-2 positive compared with**  
693 **SARS-CoV-2 negative patients (dataset GSE152075).** **a**, Number of SARS-CoV-2 (SC2)  
694 positive and negative samples by groups: gender, age (young < 60; elderly ≥ 60 years old)  
695 and viral load (low and high). **b**, The total number of differentially expressed genes in SC2  
696 positive samples by group. **c**, Functional over-representation obtained by modular gene co-  
697 expression analysis (see Extended Data. Fig. 1) indicating a relationship between alterations  
698 in neutrophil activation and signaling by interleukins during the *in vivo* immune response to  
699 SARS-CoV-2. **d**, The total number of DEGs associated with cytokine-mediated signaling  
700 pathways (CMSP, red bars) and neutrophil-mediated immunity (NMI, blue bars) when  
701 comparing SC2 positive patients with corresponding viral load-, gender-, and age-matched  
702 negative SC2 samples. **e**, Heliographic and **f**, network representation of canonical correlation

703 analysis of CMSP and NMI genes from SC2 positive patients supporting the correlation  
704 between these two gene ontology categories. CMSP and NMI genes with the Pearson  
705 correlation coefficient or  $r \geq 0.7$  are red and blue, respectively, while those with  $r < 0.7$  are  
706 grey in both groups. Genes with corresponding principal component loadings  $< 0.7$  have their  
707 names omitted. Cy-CV1: canonical variable 1 associated with CMSP genes; Cy-CV2:  
708 canonical variable 2 associated with CMSP genes; Ne-CV1: canonical variable 1 associated  
709 with NMI genes; Ne-CV2: canonical variable 2 associated with NMI genes.

710

711 **Fig. 2 | Modular gene co-expression analysis of differentially expressed genes of total**  
712 **leukocytes from SARS-CoV-2 patients (dataset GSE157103).** **a**, Bubble heatmap showing  
713 the gene set enrichment of each module activity in peripheral blood leukocytes (PBLs) from  
714 SARS-CoV-2 (SC2) positive and negative subjects by gender, age (young  $< 60$ ; elderly  $\geq 60$   
715 years old), and severity (admitted or not at intensive care unit, ICU). Symbol size and color  
716 reflect the normalized enrichment score (NES). **b-d**, Functional over-representation  
717 interaction plot of gene co-expression modules, showing the enriched association between  
718 alterations in neutrophil degranulation and signaling by interleukins (module M1; **b**) as well  
719 as the enrichment of interferon signaling activation (module M4; **c**) and neutrophil  
720 degranulation (module M7; **d**) in PBLs. The interaction plots highlight gene nodes on each  
721 network, with potential hubs demonstrated inside rectangles and each node's size  
722 proportionally to its degree.

723

724 **Fig. 3 | Cytokine-mediated signaling pathway signature by gender, age and viral load.**  
725 **a**, Relative effects of transformed cytokine-mediated signaling pathway (CMSP) genes  
726 between SARS-CoV-2 positive (SC2) and negative (Neg. SC2) groups. Shaded areas  
727 indicate 95% percentile bootstrap confidence intervals for relative effects, based on 1000  
728 bootstrap simulations. **b**, Central tendency (median) of gene expression for CMSP genes in  
729 each category versus the viral load-, gender-, and age-matched neg. SC2 controls. **c**, Bubble  
730 heatmap showing the expression pattern of CMSP genes by viral load, gender, and age  
731 groups. The size and color of circles correspond to  $-\text{Log}_{10}$  transformed adjusted  $p$ -value and  
732  $\text{Log}_2$  fold change ( $\text{Log}_2\text{FC}$ ), respectively. The cutoff applied to identify the upregulated  
733 genes was  $\text{Log}_2\text{FC} > 1$  and adjusted  $p$ -value  $< 0.05$ . Rows and columns were clustered  
734 based on Euclidean distance between  $\text{Log}_2\text{FC}$  values. **d**, Bubble heatmap representing the  
735 top-ranked combined scores for Biological Process (Gene Ontology) associated with CMSP  
736 genes in SC2 versus Neg. SC2 samples by groups. The circles' size and color correspond to  
737  $-\text{Log}_{10}$  transformed adjusted  $P$ -value and Combined Score, respectively. Rows and columns  
738 were clustered based on Euclidean distance between Combined Score values.

739

740 **Fig. 4 | Neutrophil-mediated immunity signature by gender, age and viral load. a,**  
741 Relative effects of transformed Neutrophil-mediated immunity (NMI) genes between SARS-  
742 CoV-2 positive (SC2) and negative (Neg. SC2) groups. Shaded areas indicate 95%  
743 percentile bootstrap confidence intervals for relative effects, based on 1000 bootstrap  
744 simulations. **b,** Central tendency (median) of gene expression for NMI genes in each  
745 category versus the viral load-, gender-, and age-matched neg. SC2 controls. **c,** Bubble  
746 heatmap showing the expression pattern of NMI genes by viral load, gender, and age  
747 groups. The size and color of circles correspond to  $-\text{Log}_{10}$  transformed adjusted  $p$ -value and  
748  $\text{Log}_2$  fold change ( $\text{Log}_2\text{FC}$ ), respectively. The cutoff applied to identify the upregulated  
749 genes was  $\text{Log}_2\text{FC} > 1$  and adjusted  $p$ -value  $< 0.05$ . Rows and columns were clustered  
750 based on Euclidean distance between  $\text{Log}_2\text{FC}$  values. **d,** Bubble heatmap representing the  
751 top-ranked combined scores for Biological Process (Gene Ontology) associated with NMI  
752 genes in SC2 versus Neg. SC2 samples by groups. The circles' size and color correspond to  
753  $-\text{Log}_{10}$  transformed adjusted  $P$ -value and Combined Score, respectively. Rows and columns  
754 were clustered based on Euclidean distance between Combined Score values. **e, f,** The  
755 thickness of each link in the Circos plot represents the number of shared cytokine-mediated  
756 signaling pathway (CMSP) (**e**) and NMI (**f**) genes throughout the datasets (GSE152075,  
757 GSE157103, and GSE156063) distributed by gender, age (young  $< 60$ ; elderly  $\geq 60$  years  
758 old), viral load (low and high), and severity (admitted or not at intensive care unit, ICU).

759

760 **Fig. 5 | Transcriptional differences in cytokine-mediated signaling pathway and**  
761 **neutrophil-mediated immunity genes distinguish females and males. a-b,** Violin plots  
762 present differentially expressed genes (DEGs,  $p$ -value  $< 0.05$  and fold change (FC)  $> 2$ ) of  
763 cytokine-mediated signaling pathway (CMSP) (**a**) and neutrophil mediated immunity (NMI)  
764 (**b**) of SARS-CoV-2 positive (SC2) female samples versus SC2 male samples from the  
765 dataset GSE152075. **c,** Swab samples from positive SC2 patients from the dataset  
766 GSE156063 showing the DEGs associated with CMSP and NMI in female versus male  
767 samples. **d,** Unsupervised hierarchical clustering heatmap of CMSP and NMI genes  
768 (normalized gene expression in  $\text{Log}_2$  counts per million or CPM). On the right, red tracks  
769 denote CMSP genes, and blue tracks represent NMI genes. **e,** DEGs ( $p$ -value  $< 0.05$  and FC  
770  $> 2$ ) enriching cytokine-mediated signaling pathway in negative SC2 (Neg. SC2) female  
771 samples. **f,** DEGs enriching NMI of Neg. SC2 female versus Neg. SC2 male samples. All  
772 data of the violin plots are normalized expression ( $\text{Log}_2$  CPM). **g,** Multivariate regression  
773 modeling indicates that the expression values of the six genes (on the top, and also shown in  
774 **Fig. 5a** and **5b**) systemically associate with the expression of the other CMSP and NMI  
775 genes (shown in the X-axis and represented by the PC1 scores). Each dot represents a

776 unique sample individual (purple: female; green: male). PC1:  $p$ -value  $< 0.05$  indicates a  
777 significant association between the expression of 6 DEGs (vertical axis; *CD14*, *CXCR1*,  
778 *CXCR2*, *IL-1 $\beta$* , *NBEAL2*, *S100A9*) with the PC1 score (expression of remaining genes,  
779 transformed by  $\text{Log}_2(\text{CPM}+1)$ ), which are shown in the horizontal axis. Gender  $p$ -value  $\leq 0.05$   
780 indicates significant differences in the mean expression of females compared to males  
781 regarding the 6 DEGs. Gender  $\times$  PC1  $p$ -value  $\leq 0.05$  indicates significant changes between  
782 females and males along the gradient (continuum) of the PC1 score.

783

784 **Fig. 6 | Network of cytokine-mediated signaling pathway and neutrophil-mediated**  
785 **immunity. a**, Interactome between CMSP and NMI genes, highlighting the genes  
786 differentially expressed in female samples. Node color represents the GO molecular function  
787 associated with the gene. Triangles pointing up indicate CMSP genes, triangles pointing  
788 down indicate NMI genes. The light blue circles represent DEGs in females in both infected  
789 and uninfected samples. Blue edges highlight the NMI interactions; red edges reflect the  
790 CMSP interactions. The lower left subnetwork and lower right subnetwork show the  
791 interactions between CMSP and NMI genes, respectively. The label color represents the type  
792 of interferome associated with the gene. Interaction network was visualized using  
793 NAViGaTOR **b**, Dot plot presenting the two ontologies with adj.  $p$ -value  $< 0.01$  enriched from  
794 exclusively female genes. X-axis presents the number of genes enriching the ontology term,  
795 and the dot size is proportional to this number. **c**, Interaction network of exclusive female  
796 genes. The node size is representing the number of genes according to each term.

797

798 **Extended Data Fig. 1 | Interquartile range of gene expression by gender, age, and viral**  
799 **load. a-b**, Measure of variability (interquartile range) of gene expressions for (a) cytokine-  
800 mediated signaling pathway (CMSP) genes and (b) neutrophil-mediated immunity (NMI)  
801 genes by categories viral load-, gender-, and age-matched SARS-CoV-2 (SC2) positive vs.  
802 Negative (Neg. SC2).

803

804 **Extended Data Fig. 2 | The relationship between gene expression and viral load. a**, The  
805 association between the expression of CMSP and NMI genes and viral load was calculated  
806 using Ridge regression estimates as described in the material and methods. Due to the  
807 N1.Ct1 values (viral load) being inversely proportional to the amount of viruses detected by  
808 PCR, genes with higher regression coefficient estimate tends to correlate negatively with the  
809 viral load, and conversely. Only observations from the positive SC2 group were used for the  
810 estimation of parameters in the model. CMSP: cytokine-mediated signaling pathway, NMI:  
811 neutrophil mediated-immunity. SC2 = SARS-CoV-2 positive. **b**, Accuracy of the ridge

812 regression model fitted for estimating viral load as a linear function of age, gender and  
813 transformed gene expressions. Each dot corresponds to an individual observation of the  
814 testing dataset, which was composed of 25% of the sample (total SC2 positive group).

815 **Extended Data Fig. 3 | Validation of cytokine-mediated signaling pathway and**  
816 **neutrophil-mediated immunity genes in swab samples (GSE156063). a, c, e, g,**  
817 Upsetplot displaying the set intersections for upregulated and downregulated genes in the  
818 Lieberman *et al.* dataset (GSE152075) and Mick *et al.* dataset (GSE156063) female samples  
819 (a), male (c), young (e), and elderly (g). b, d, f, h, Boxplot showing the common differentially  
820 expressed genes in female samples (b), male (d), young (f), and elderly (h) of the Mick *et al.*  
821 dataset. Data are presented as normalized expression (Log2 CPM) SARS-CoV-2 vs.  
822 negative SC2 samples, considering only the cytokine-mediated signaling pathway (CMSP)  
823 and neutrophil-mediated immunity (NMI) genes with adj *p*-value < 0.05 and Log2FC >1. Set  
824 1: upregulated in Lieberman *et al.* dataset (GSE152075); Set 2: downregulated in Lieberman  
825 *et al.* dataset (GSE152075); Set 3: upregulated in Mick *et al.* dataset (GSE156063); Set 4:  
826 downregulated in Mick *et al.* dataset (GSE156063).

827 **Extended Data Fig. 4 | Upregulated CMSP genes and downregulated NMI genes**  
828 **identified by single cell RNAseq (dataset EGAS00001004571) a,b,** Dot plot of enriched  
829 terms (a) upregulated and (b) downregulated in neutrophil clusters obtained as described by  
830 Schulte-Schrepping *et al.*<sup>86</sup>. c, d, Cnetplot of CMSP and NMI-associated genes. Graphics  
831 were obtained using clusterProfiler.

832 **Extended Data Fig. 5 | Percentage of deaths due to COVID-19 is higher in males than in**  
833 **females. a,** Percentage of male and female deaths by countries. Data were retrieved from  
834 <https://globalhealth5050.org/the-sex-gender-and-covid-19-project/dataset/>.

835 **Extended Data Fig. 6 | Enrichment analysis of downregulated genes in female samples**  
836 **compared with male samples from the Mick *et al.* dataset (GSE156063). a,** Most  
837 enriched biological process terms (adj *p*-value < 0.05) with downregulated genes in female  
838 samples positive for SARS-CoV-2 compared with male samples positive for SARS-CoV-2  
839 (validation dataset GSE156063). b, most enriched biological process terms (adj *p*-value <  
840 0.05) with downregulated genes in female samples negative for SARS-CoV-2 compared with  
841 male samples negative for SARS-CoV-2 (validation dataset GSE156063).

842 **Extended Data Fig. 7 | Relationship between the gene expression with the viral load**  
843 **and age. a-b,** Multivariate regression modeling indicates the expression values of the 6  
844 genes (*CD14*, *CXCR1*, *CXCR2*, *IL-1β*, *NBEAL2*, *S100A9*) and their association with a, Viral  
845 load and b, Age. Each dot represents a unique individual sample (purple: female; green:  
846 male). Viral load or Age: *p*-value < 0.05 indicates a significant association of these variables  
847 with the expression of these 6 DEGs (transformed by Log2(CPM+1), which are shown in the

848 horizontal axis. Gender  $p$ -value  $\leq 0.05$  indicates significant differences in the mean  
849 expression of females compared to males regarding the 6 DEGs. Gender x Viral load or Age:  
850  $p$ -value  $\leq 0.05$  indicates significant changes between female and male along the gradient  
851 (continuum) of viral load or age. Scaled means that the variable was transformed by  
852 subtracting its mean and division by its standard deviation.

853 **Extended Data Fig. 8 | Relationship between the profile of gene expression respect to**  
854 **viral load and age. a**, Network showing the correlation between genes and its association  
855 with the principal component (PC) analysis performed for obtaining the regression covariate  
856 PC1 included in the multivariate regression model described in the Statistical Methods  
857 section. Only observations from the SC2 group were used for analysis. CMSP and NMI  
858 genes are colored in red and blue, respectively. Pearson correlations  $\geq 0.7$  are indicated by  
859 grey lines. The size of nodes and gene names are directly proportional to the principal  
860 component loadings. Genes with corresponding principal component loadings  $< 0.7$  have  
861 their names omitted. The loading estimates were all positive after varimax rotation. **b**, Graphs  
862 for residual analysis and diagnostics of the multivariate regression model fitted for modeling  
863 the transformed gene expression of *CD14*, *CXCR1*, *CXCR2*, *IL1 $\beta$* , *NBEAL2*, and *S100A9* as  
864 a linear function of the covariates age, gender, viral load (n1\_ct), and PC1. For the Gender x  
865 Index of the observation graph, the value 0 indicates male, and the value 1 indicates female.  
866 PC1: scores for each observation on the first principal component based on the remaining  
867 genes not included as response variables in the model.

868

869

870

871

872

**a**

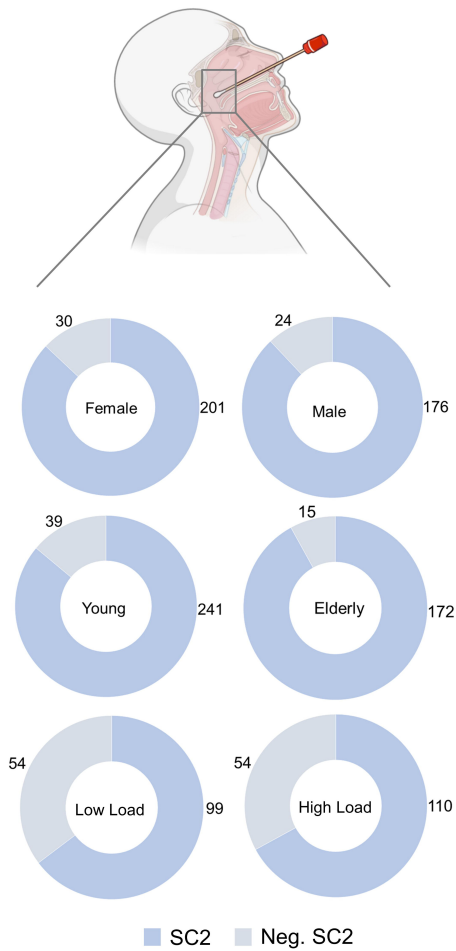

**b**

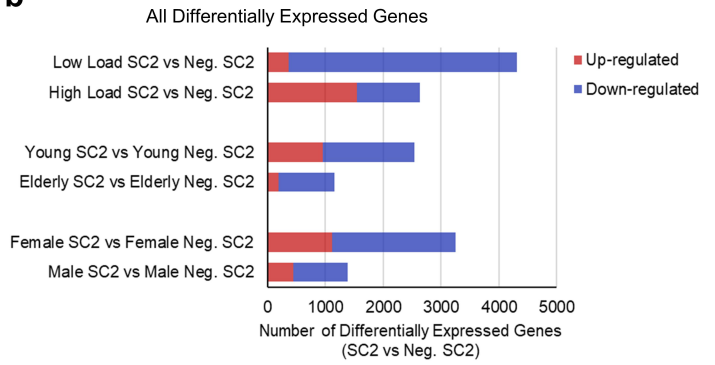

**c**

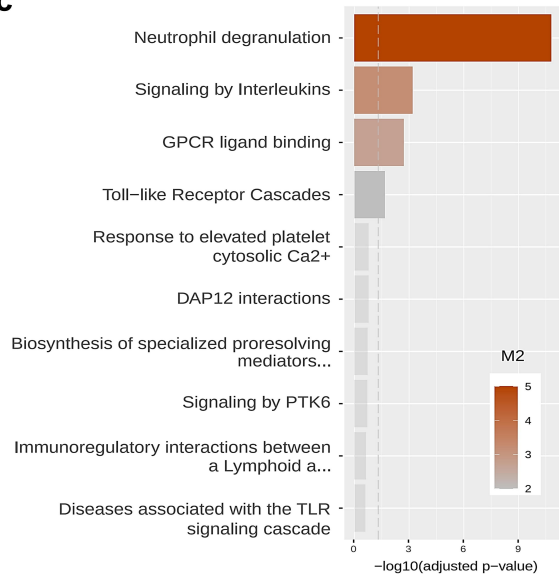

**d**

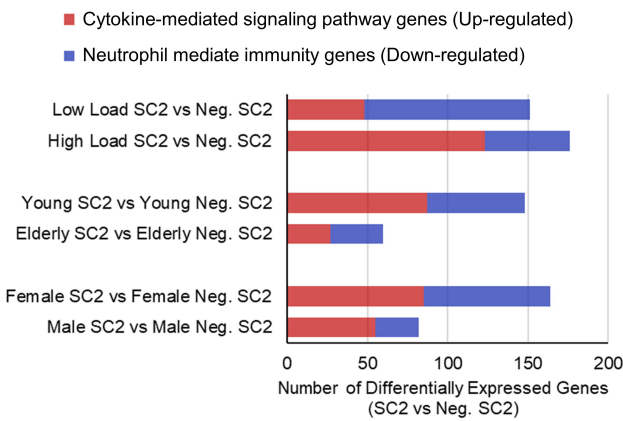

**e**

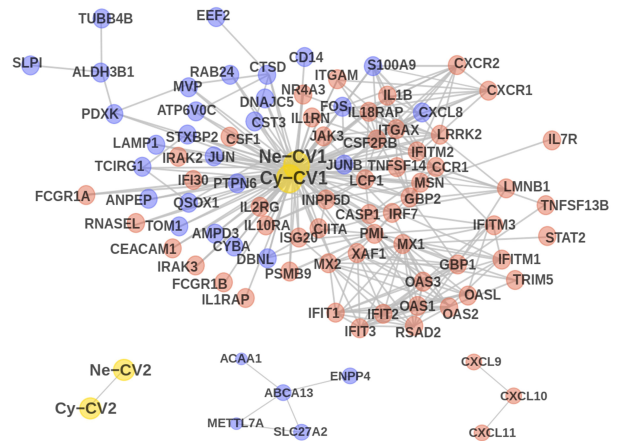

**f**

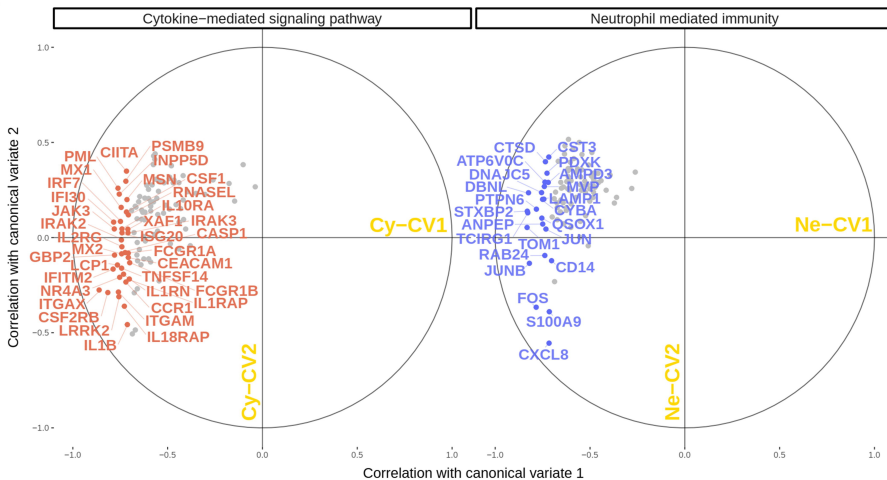

**a**

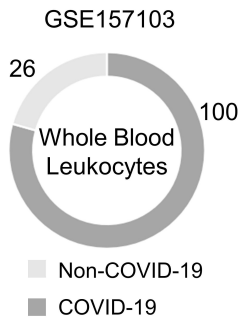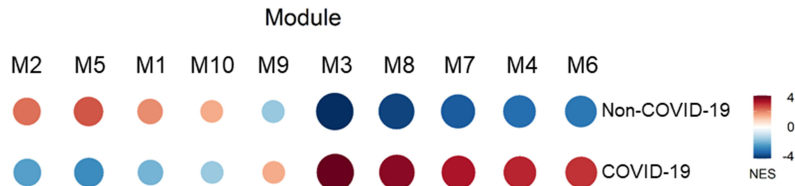

**b**

M6

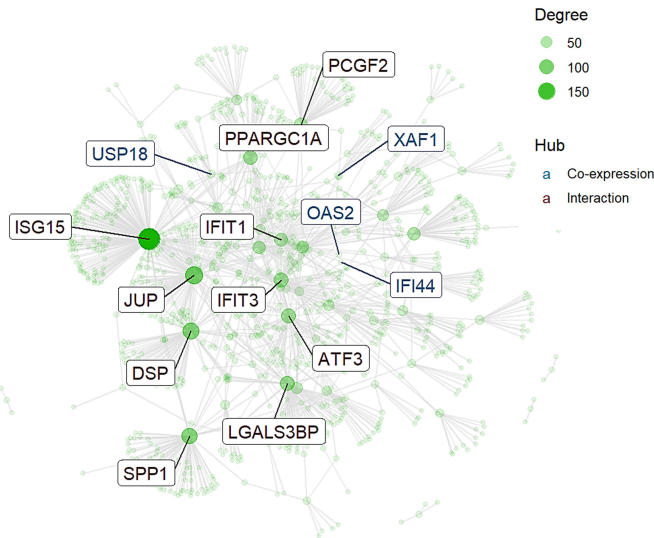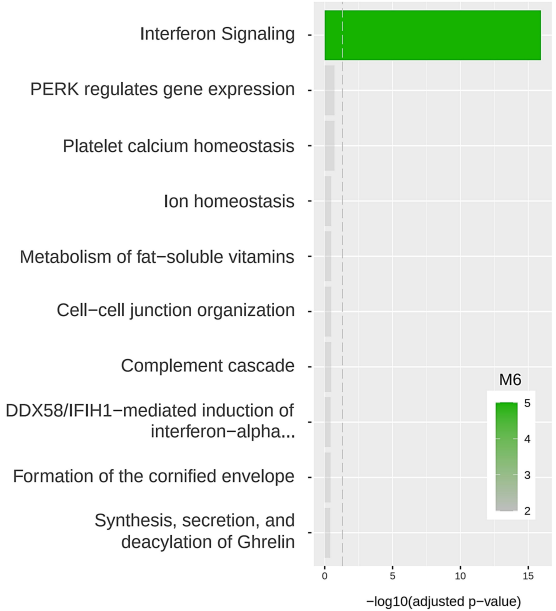

**c**

M7

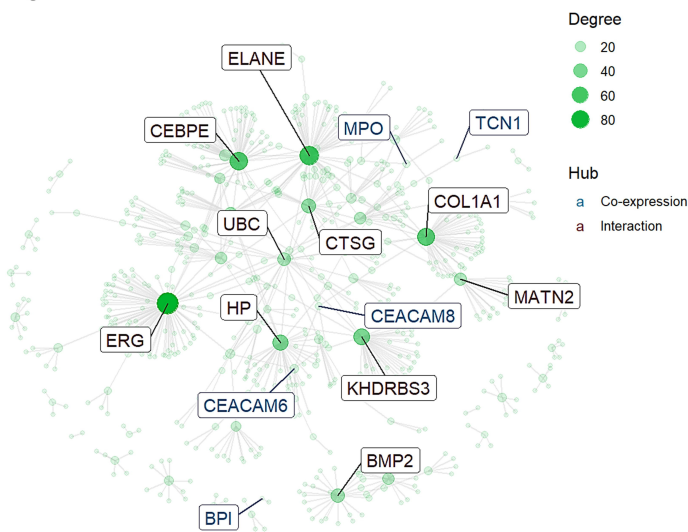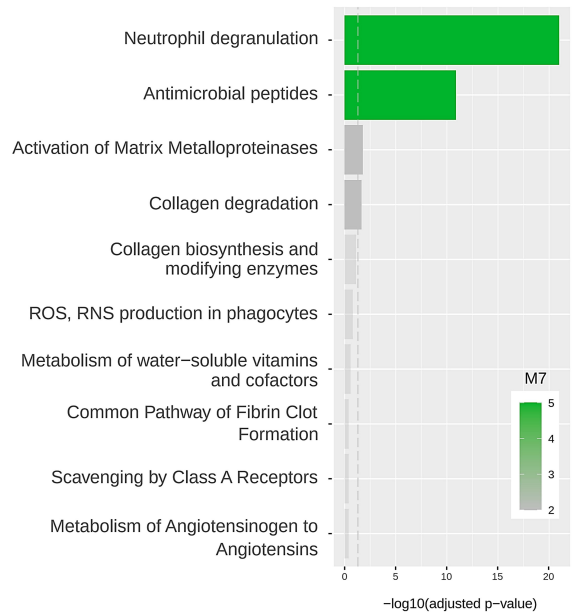



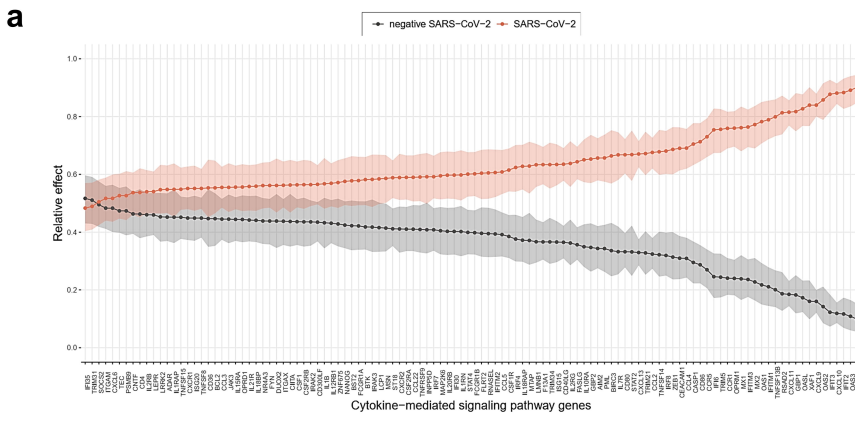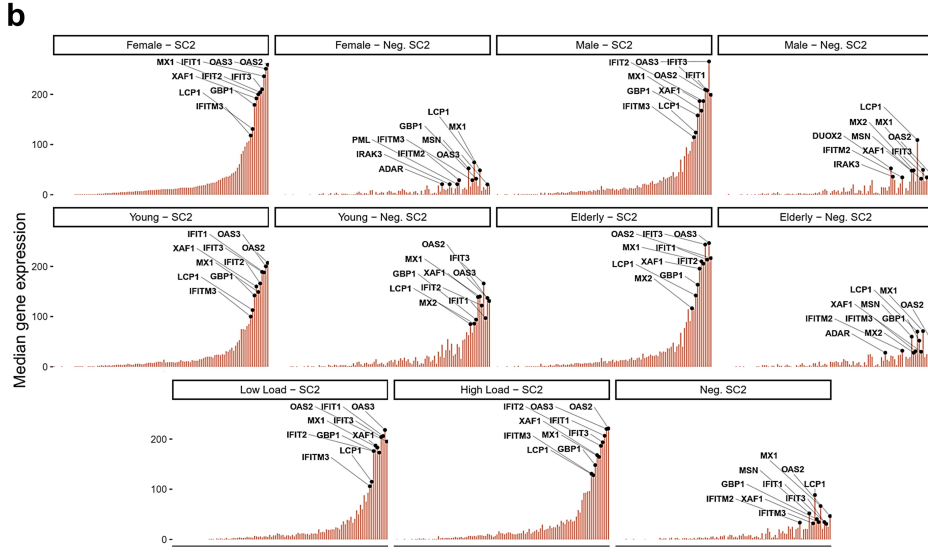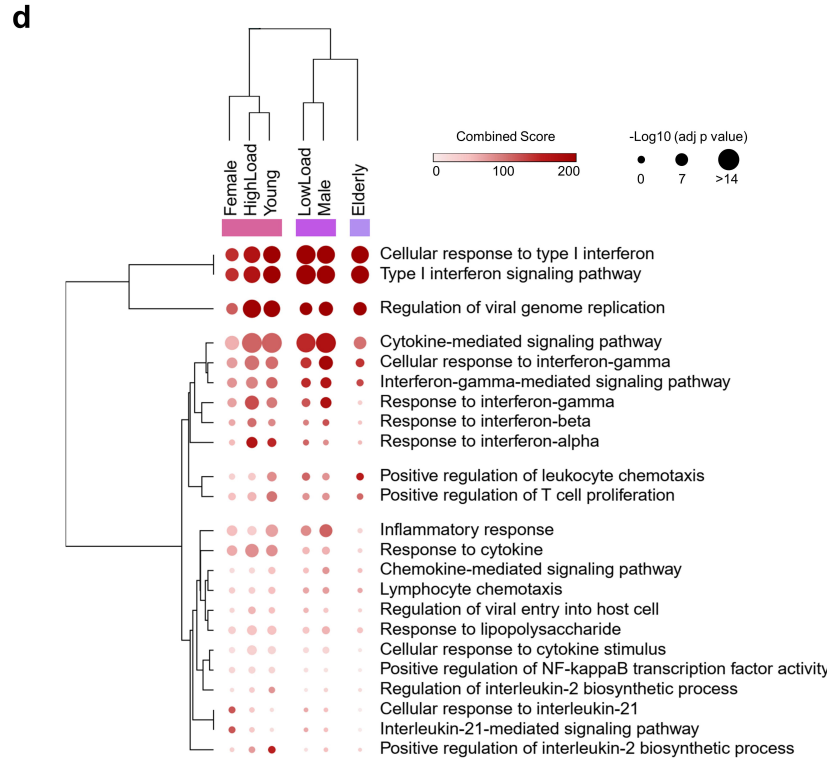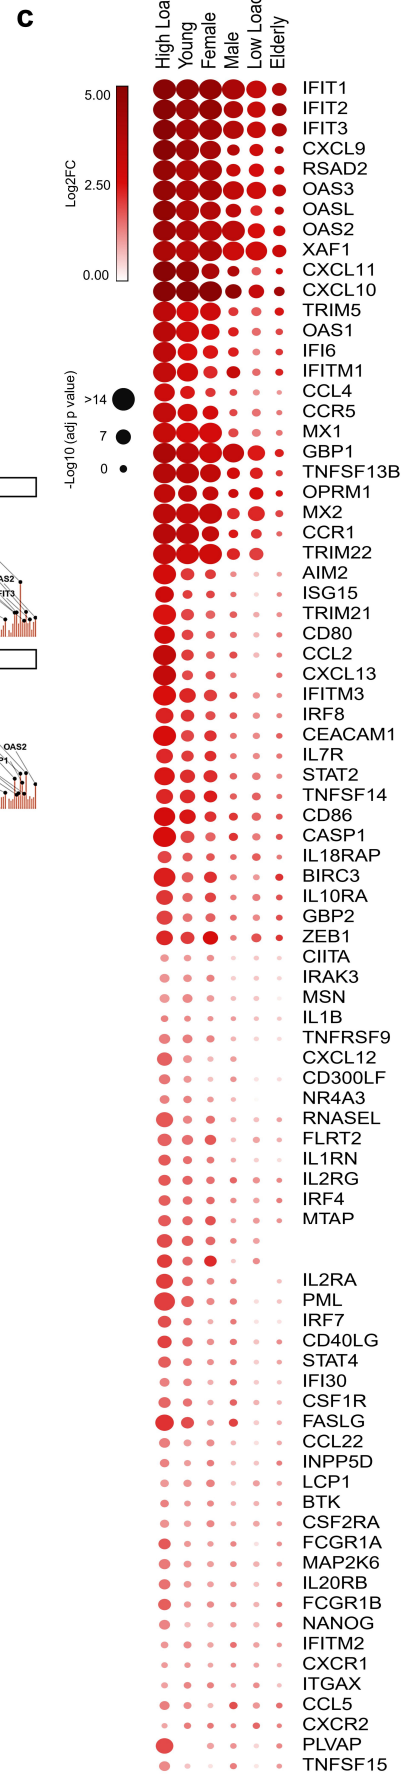

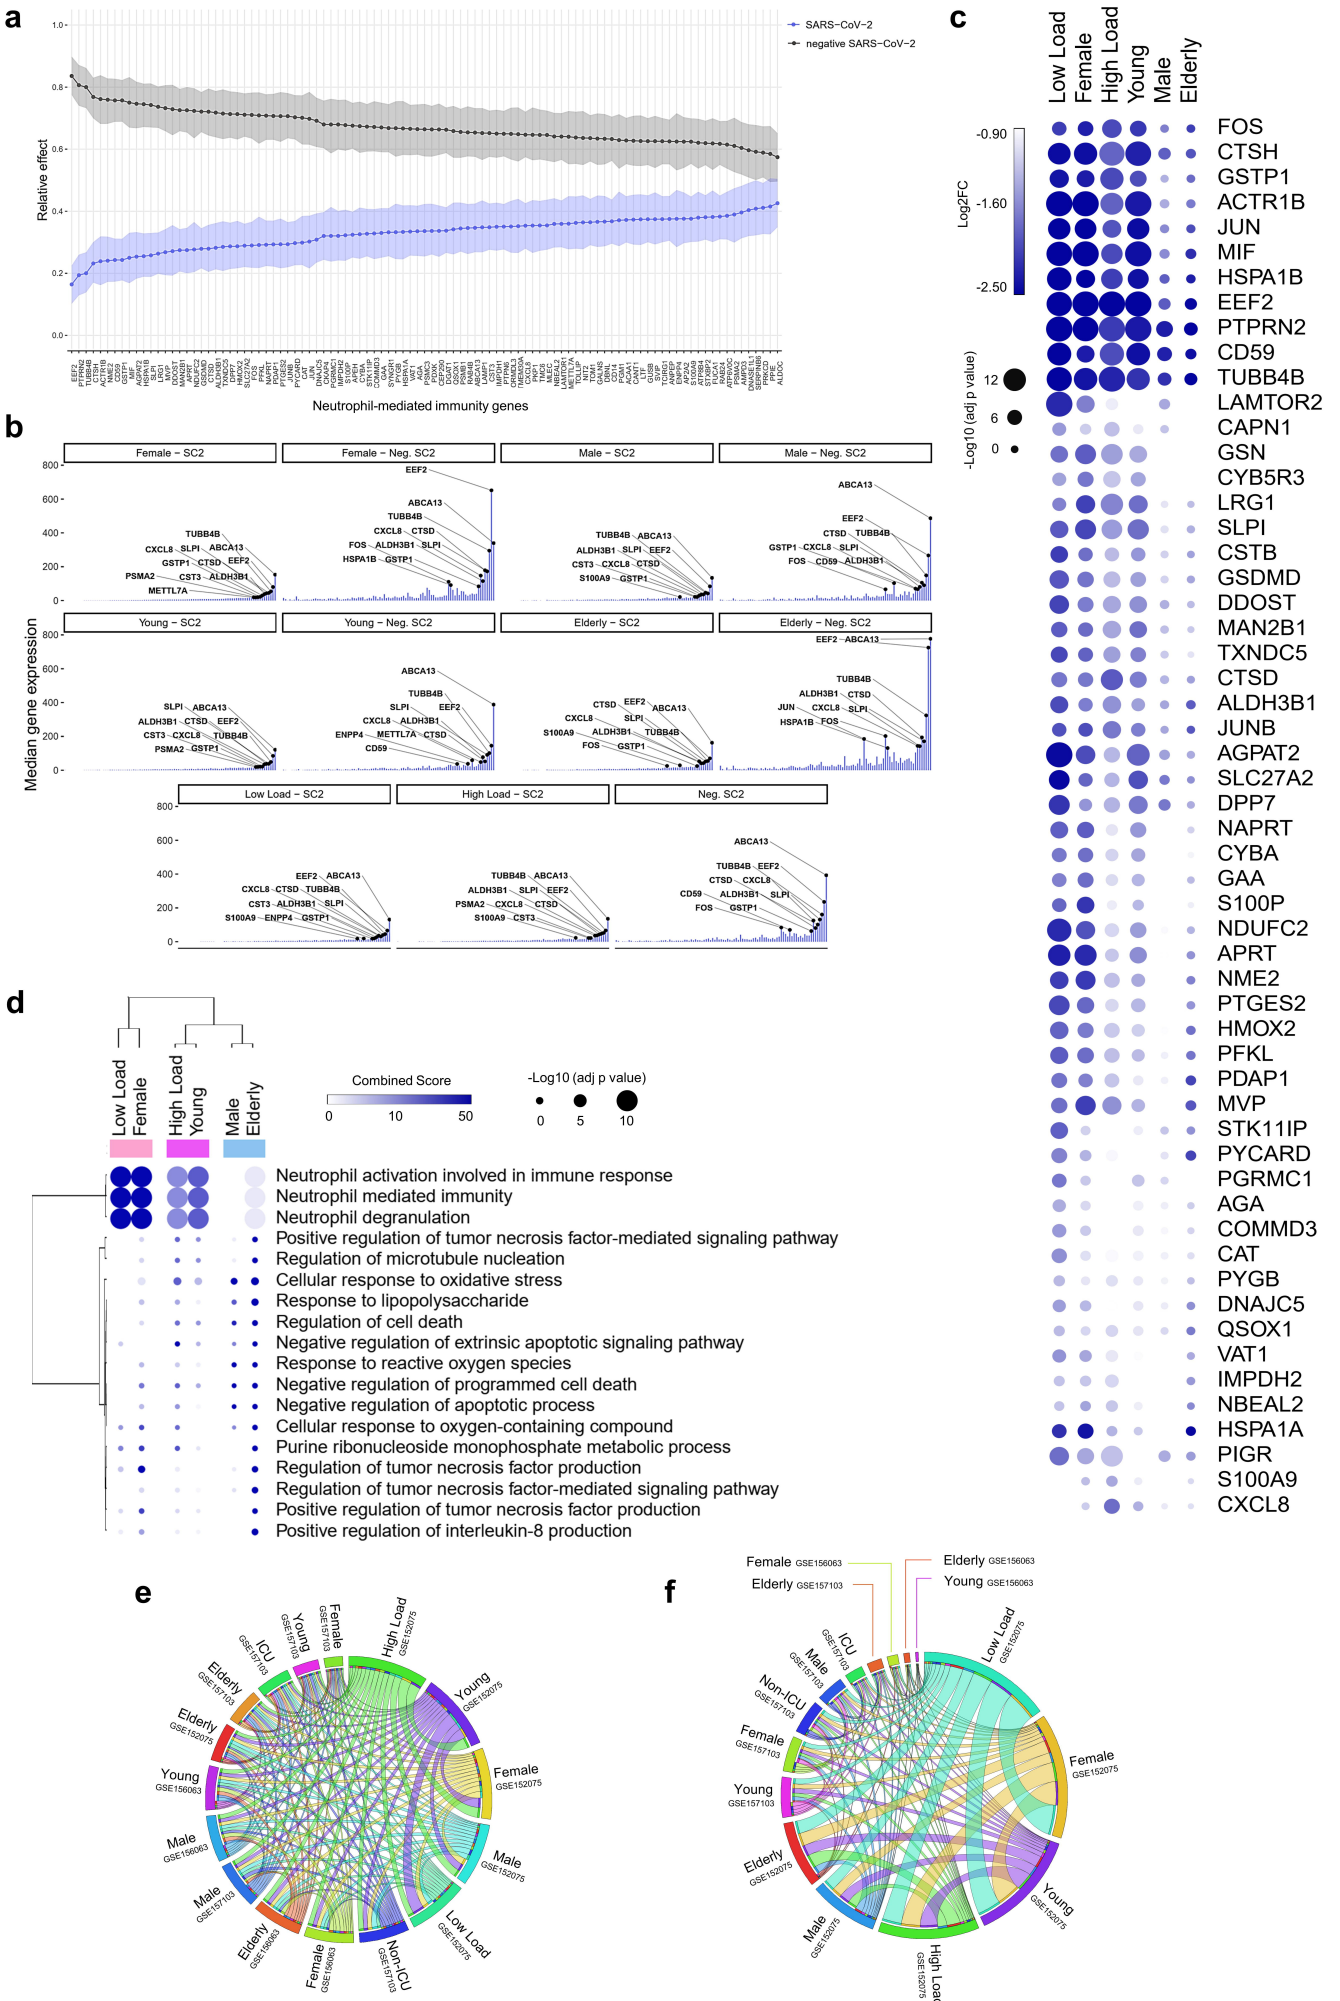

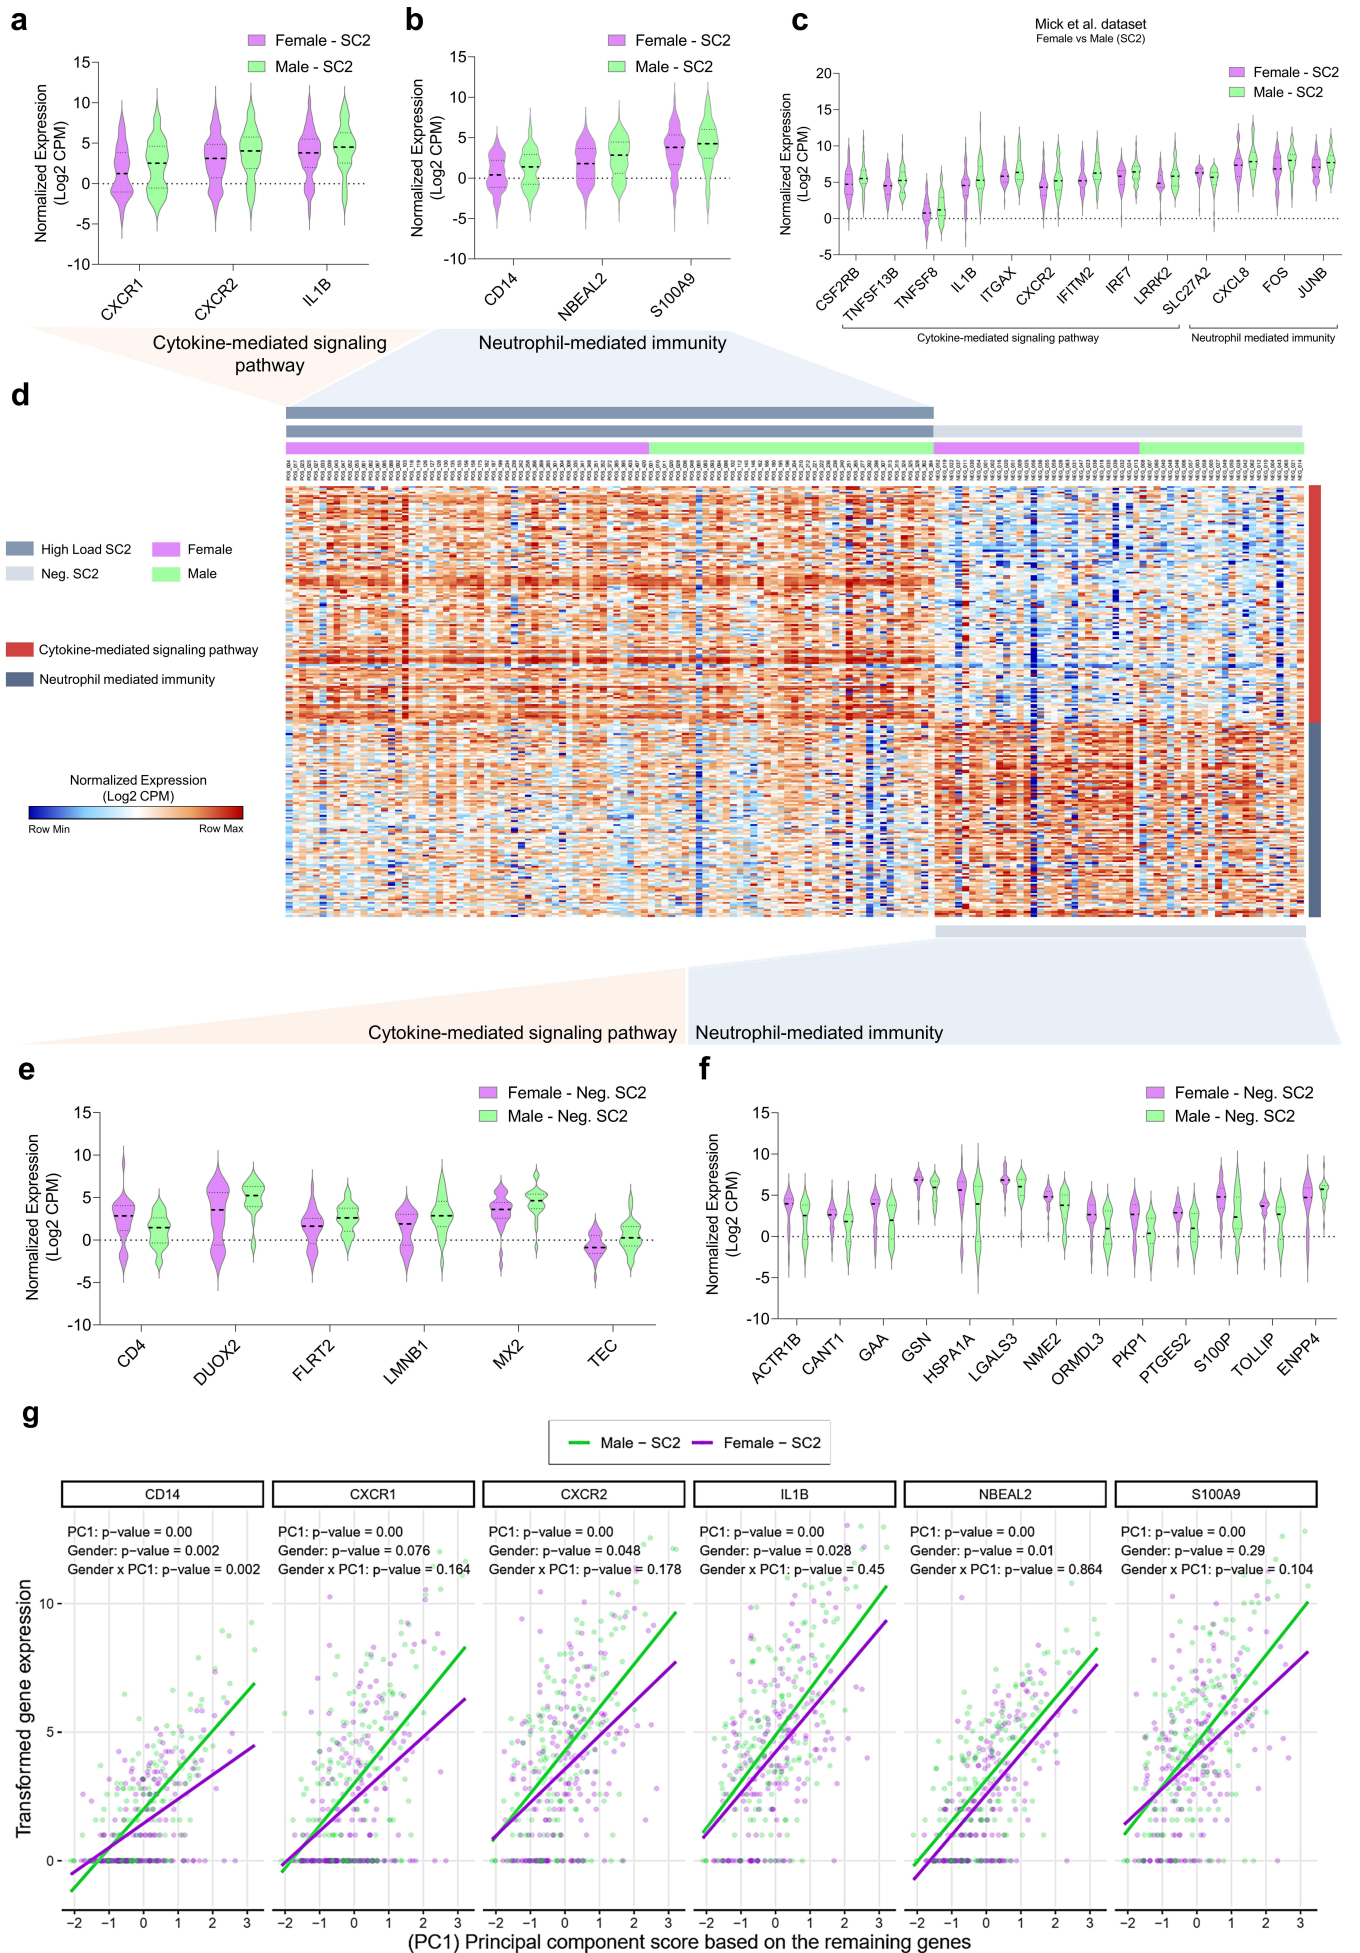

**a**

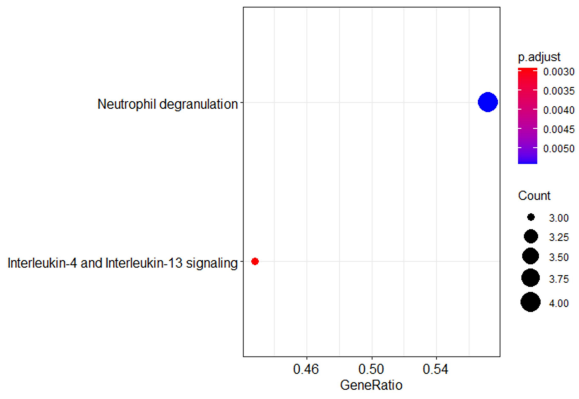

**b**

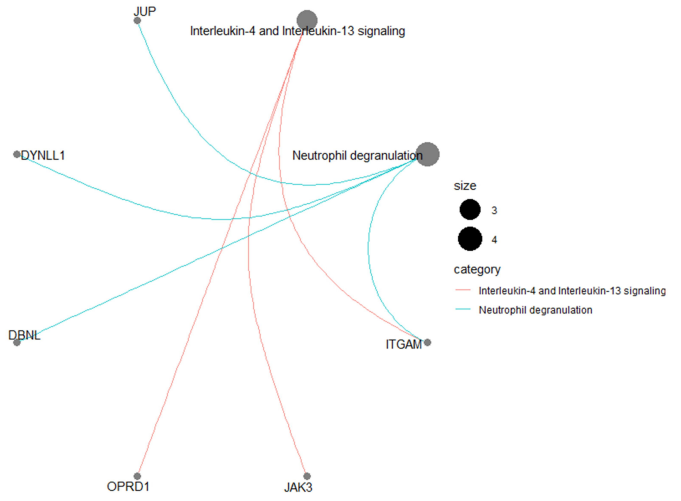

**c**

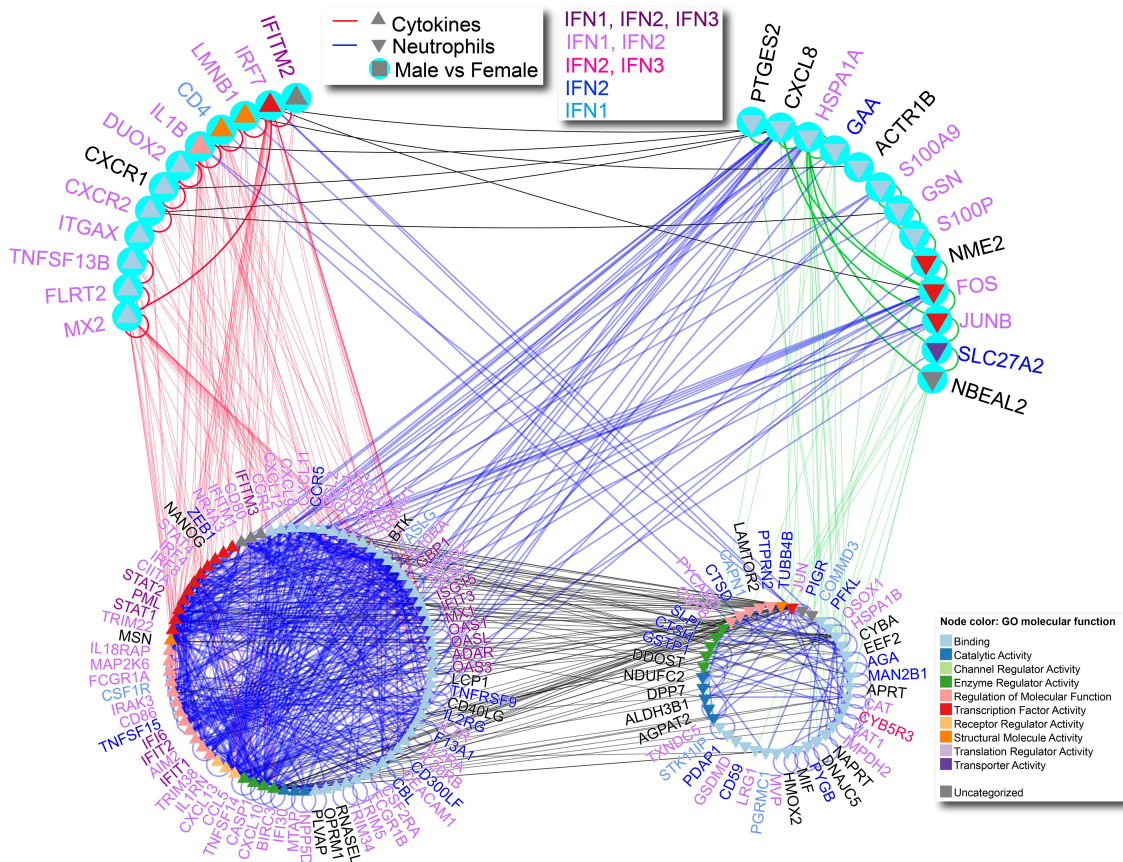

Source: https://medrxiv.org/content/medrxiv/early/2020/11/16/2020.11.12.20230417.full.pdf
